# Supplementary material for: TickPath Layerplex: adaptation of a real-time PCR methodology for the simultaneous detection and molecular surveillance of tick-borne pathogens
Source: PubMed Central journal article supplement (PMC6502835; doi:10.1038/s41598-019-43424-y), 2019-05-06
Supplement: 41598_2019_43424_MOESM1_ESM.pdf [file 41598_2019_43424_MOESM1_ESM.pdf]

**TITLE:**

TickPath Layerplex: adaptation of a real-time PCR methodology for the simultaneous detection and molecular surveillance of tick-borne pathogens

**AUTHORS:**

Joseph J. Modarelli<sup>1</sup>, Pamela J. Ferro<sup>2</sup>, Alberto A. Perez De Leon<sup>3</sup>, Maria D. Esteve-Gasent<sup>1\*</sup>

**AFFILIATION:**

<sup>1</sup> Department of Veterinary Pathobiology, College of Veterinary Medicine and Biomedical Sciences, Texas A&M University, College Station, TX, 77843.

<sup>2</sup> Texas A&M Veterinary Medical Diagnostic Laboratory, Texas A&M University, College Station, TX, 77843

<sup>3</sup>USDA–ARS Knipling–Bushland U.S. Livestock Insects Research Laboratory and Veterinary Pest Genomics Center, Kerrville, TX, 78028.

\*Correspondence and requests for materials should be addressed to M.E.G. (email: MEsteve-Gassent@cvm.tamu.edu)



| (C) Organism           | qPCR | Bp.flaB.406F (5' → 3')                           | Bp.flaB.443P (5' → 3')                              | Bp.flaB.522R (5' → 3')                          |
|------------------------|------|--------------------------------------------------|-----------------------------------------------------|-------------------------------------------------|
| <i>B. parkeri</i>      | +    | T T G T C C A A T A A G T C A G C T G C T C A G  | C T G A A G A G C T T G G A A T G C A A C C T G C A | T C T T A A T G T C C A T G A A G C T T G T G C |
| <i>B. turicatae</i>    | -    | .....C.....A                                     | .....                                               | .....A                                          |
| <i>B. hermsii</i> GGI  | -    | .....C.....A                                     | .....                                               | .....C.....A                                    |
| <i>B. hermsii</i> GGII | -    | .....C.....A                                     | .....                                               | .....C.....A                                    |
| <i>B. anserina</i>     | -    | .....T.....C.....A                               | .....G.....                                         | .....A                                          |
| <i>B. coriacea</i>     | -    | .....T.....A.....G.....                          | .....                                               | .....C.....A                                    |
| <i>B. miyamotoi</i>    | -    | .....A.....T.....A                               | .....                                               | .....C.....A                                    |
| <i>B. recurrentis</i>  | -    | .....A.....T.....G A.....T.....G.....A           | .....                                               | .....T.....A                                    |
| <i>B. crocidurae</i>   | -    | .....A.....T.....G A.....T.....G.....A           | .....                                               | .....T.....A                                    |
| <i>B. burgdorferi</i>  | -    | .....A.....A.....C.....A.....T.....T.....A       | .....G.....                                         | .....A.....A.....C.....A.....A                  |
| <i>B. afzelii</i>      | -    | .....A.....A.....C.....A.....T.....T.....C.....A | .....G.....                                         | .....A.....A.....A.....A.....A                  |
| <i>B. garinii</i>      | -    | .....A.....C.....A.....T.....T.....C.....A       | .....A.....                                         | .....G.....A.....A.....A.....A                  |

| (D) Organism           | qPCR | Bt.bipA.728F / Bt.bipA.731F (5' → 3')                        | Bt.bipA.817P (5' → 3')                                      | Bt.bipA.869R (5' → 3')                              |
|------------------------|------|--------------------------------------------------------------|-------------------------------------------------------------|-----------------------------------------------------|
| <i>B. turicatae</i> 1  | +    | A G A C C G G T A C A C A G G A T T C T A A A G C            | A G T T T T G G G A A G T G T T G T T G G T G G C G T       | G T T C C T G C T C C C T G A A T A A C A T T A T C |
| <i>B. turicatae</i> 2  | +    | .....C C G G C A C A C A G G A T T C T A A A A C             | .....                                                       | .....                                               |
| <i>B. parkeri</i>      | -    | .....T A A A.....A                                           | .....A.....A                                                | .....                                               |
| <i>B. hermsii</i> GGI  | -    | .....T T C.....C.....G T C.....T.....G.....A.....A G T.....A | .....A.....G A.....T A T G.....A C.....A G A A.....G A..... | .....C T.....T G C.....G.....G G.....C.....T        |
| <i>B. hermsii</i> GGII | -    | .....T T T.....C.....G T T T T.....G.....A.....A G T.....A   | .....A.....G A.....M A T G.....A C.....A G A A.....G A C    | .....C.....C T.....C.....G.....G G C C.....T        |
| <i>B. miyamotoi</i>    | -    | .....                                                        | .....                                                       | .....                                               |
| <i>B. coriacea</i>     | -    | .....                                                        | .....                                                       | .....                                               |
| <i>B. anserina</i>     | -    | .....                                                        | .....                                                       | .....                                               |
| <i>B. crocidurae</i>   | -    | .....                                                        | .....                                                       | .....                                               |
| <i>B. recurrentis</i>  | -    | .....                                                        | .....                                                       | .....                                               |
| <i>B. burgdorferi</i>  | -    | .....                                                        | .....                                                       | .....                                               |
| <i>B. afzelii</i>      | -    | .....                                                        | .....                                                       | .....                                               |
| <i>B. garinii</i>      | -    | .....                                                        | .....                                                       | .....                                               |

| (E) Organism              | qPCR | Ee.16S.40F (5' → 3')                                               | Ehr-spp.16S.83P (5' → 3')                                 | Ech-ec.16S.174R (5' → 3')                               |
|---------------------------|------|--------------------------------------------------------------------|-----------------------------------------------------------|---------------------------------------------------------|
| <i>E. ewingii</i>         | +    | C G A A C G A A C A A T T C C T A A A T A G T C T C T              | A G A T T C C T A C G C A T T A C T C A C C C G T C T G C | C C A T C A T T T C T A A T G G C T A T T C C A T A C T |
| <i>E. canis</i>           | -    | .....G.....A T.....T.....T A G C C T C T G                         | .....T.....                                               | .....C.....G.....                                       |
| <i>E. muris</i>           | -    | .....G.....T.....G C.....A.....C C.....T A G C.....T.....T         | .....                                                     | .....                                                   |
| <i>E. ruminantium</i>     | -    | .....G.....G.....A T.....T.....T A G C.....T C G G                 | .....                                                     | .....T.....A.....                                       |
| <i>E. chaffeensis</i>     | -    | .....G.....G.....T.....T.....T A.....C C T.....T                   | .....                                                     | .....                                                   |
| <i>A. phagocytophilum</i> | -    | .....G.....T T.....T.....T.....T A G C.....T G.....                | .....T.....                                               | .....C.....G.....C.....                                 |
| <i>A. marginale</i>       | -    | .....G.....C G.....A T A C G C A G C.....T G.....                  | .....T.....                                               | .....C.....G.....C.....                                 |
| <i>A. ovis</i>            | -    | .....G.....C G.....A.....G C G C A G C.....T G.....                | .....T.....                                               | .....C.....G.....C.....T.....                           |
| <i>A. centrale</i>        | -    | .....G.....C.....A.....G C G C A G C.....T G.....                  | .....T.....                                               | .....C.....G.....C.....T.....                           |
| <i>A. bovis</i>           | -    | .....T.....C.....T A G C.....W G.....                              | .....T.....                                               | .....C.....C.....G.....C.....T.....                     |
| <i>R. rickettsii</i>      | -    | .....A.....G.....A C G C.....A T C G G T A T.....C T.....A A       | .....C.....T G.....                                       | .....T T.....T.....A A.....T.....G.....                 |
| <i>R. typhi</i>           | -    | .....A G.....A C G.....A C G C.....A T C G G T A T.....C T.....A A | .....C.....T G.....                                       | .....T T.....T.....A A.....T.....G.....                 |

| (F) Organism              | qPCR | Ech.16S.64F (5' → 3')                                      | Ehr-spp.16S.83P (5' → 3')                                 | Ech-ec.16S.174R (5' → 3')                               |
|---------------------------|------|------------------------------------------------------------|-----------------------------------------------------------|---------------------------------------------------------|
| <i>E. chaffeensis</i>     | +    | G A A C G G A C A A T T G C T T A T A A C C T T T T        | A G A T T C C T A C G C A T T A C T C A C C C G T C T G C | C C A T C A T T T C T A A T G G C T A T T C C A T A C T |
| <i>E. canis</i>           | -    | .....A T.....G.....C.....G                                 | .....T.....                                               | .....C.....G.....                                       |
| <i>E. muris</i>           | -    | .....T.....G C.....A.....C C.....G.....T.....              | .....                                                     | .....                                                   |
| <i>E. ruminantium</i>     | -    | .....G.....A T.....T.....G.....T.....C G G                 | .....                                                     | .....T.....A.....                                       |
| <i>E. ewingii</i>         | -    | .....A.....C.....A.....A T.....G T C.....C                 | .....                                                     | .....                                                   |
| <i>A. phagocytophilum</i> | -    | .....T T.....C T.....G.....T.....G C.....                  | .....T.....                                               | .....C.....G.....C.....                                 |
| <i>A. marginale</i>       | -    | .....C G.....A T A C G C.....G.....T.....G C.....          | .....T.....                                               | .....C.....G.....C.....                                 |
| <i>A. ovis</i>            | -    | .....C G.....A.....G C G C.....G.....T.....G C.....        | .....T.....                                               | .....C.....G.....C.....T.....                           |
| <i>A. centrale</i>        | -    | .....C.....A.....G C G C.....G.....T.....G C.....          | .....T.....                                               | .....C.....G.....C.....T.....                           |
| <i>A. bovis</i>           | -    | .....T.....C.....C.....G.....W.....G C.....                | .....T.....                                               | .....C.....C.....G.....C.....T.....                     |
| <i>R. rickettsii</i>      | -    | .....A.....A C G C.....A T C G G.....T G.....A A           | .....C.....T G.....                                       | .....T T.....T.....A A.....T.....G.....                 |
| <i>R. typhi</i>           | -    | .....A G.....A C.....A C G C.....A T C G G.....T G.....A A | .....C.....T G.....                                       | .....T T.....T.....A A.....T.....G.....                 |



| (J) Organism           | qPCR | Babsp.18S.65-1F / Babsp.18S.67-2F (5' → 3')               | Babsp.18S.228P (5' → 3')                                  | Babsp.18S.289R (5' → 3')                  |
|------------------------|------|-----------------------------------------------------------|-----------------------------------------------------------|-------------------------------------------|
| <i>B. canis vogeli</i> | +    | C G C A - - - T T T A - - - G C G A T G G A C C A . . . . | C A T C A G C T T - - G A C G G T A G G G T A T T G G C C | C C T A A T T C C C C G T T A C C C G T T |
| <i>B. canis rossii</i> | +    | G C - - - T T T T A - - - G C G A T G G A C C A T T C A   |                                                           |                                           |
| <i>B. canis canis</i>  | +    |                                                           |                                                           |                                           |
| <i>B. gibsoni</i>      | +    |                                                           |                                                           |                                           |
| <i>B. caballi</i>      | +    |                                                           |                                                           |                                           |
| <i>B. odocollei</i>    | +    |                                                           |                                                           |                                           |
| <i>B. divergens</i>    | +    |                                                           |                                                           |                                           |
| <i>B. bigemina</i>     | +    |                                                           |                                                           |                                           |
| <i>B. bovis</i>        | -    |                                                           |                                                           |                                           |
| <i>B. microti</i>      | -    |                                                           |                                                           |                                           |
| <i>B. duncani</i>      | -    |                                                           |                                                           |                                           |
| <i>B. conradae</i>     | -    |                                                           |                                                           |                                           |
| <i>T. equi</i>         | -    |                                                           |                                                           |                                           |
| <i>C. felis</i>        | -    |                                                           |                                                           |                                           |
