# Supplementary material for: TickPath Layerplex: adaptation of a real-time PCR methodology for the simultaneous detection and molecular surveillance of tick-borne pathogens
Source: PubMed Central journal article supplement (PMC6502835; doi:10.1038/s41598-019-43424-y), 2019-05-06
Supplement: 41598_2019_43424_MOESM2_ESM.pdf [file 41598_2019_43424_MOESM2_ESM.pdf]

**TITLE:**

TickPath Layerplex: adaptation of a real-time PCR methodology for the simultaneous detection and molecular surveillance of tick-borne pathogens

**AUTHORS:**

Joseph J. Modarelli<sup>1</sup>, Pamela J. Ferro<sup>2</sup>, Alberto A. Perez De Leon<sup>3</sup>, Maria D. Esteve-Gasent<sup>1\*</sup>

**AFFILIATION:**

<sup>1</sup> Department of Veterinary Pathobiology, College of Veterinary Medicine and Biomedical Sciences, Texas A&M University, College Station, TX, 77843.

<sup>2</sup> Texas A&M Veterinary Medical Diagnostic Laboratory, Texas A&M University, College Station, TX, 77843.

<sup>3</sup>USDA–ARS Knippling–Bushland U.S. Livestock Insects Research Laboratory and Veterinary Pest Genomics Center, Kerrville, TX, 78028.

\*Correspondence and requests for materials should be addressed to M.E.G. (email: MEsteve-Gasent@cvm.tamu.edu)

**Supplementary Table S1.** Limit of detection analysis of the *Borrelia* species assays. Quantification cycle (Cq) values reported in mean from duplicate testing. Plasmid DNA concentrations not tested are represented by NA.

| Fold     | Plasmid DNA (ng/μl) | Target Copy # | <i>B. hermsii</i> Cq | <i>B. burgdorferi</i> Cq | <i>B. parkeri</i> Cq | <i>B. turicatae</i> Cq |
|----------|---------------------|---------------|----------------------|--------------------------|----------------------|------------------------|
| 1        | 75.91               | 1.27E+11      | NA                   | NA                       | NA                   | NA                     |
| 1.00E-06 | 7.59E-05            | 127200        | 21.3                 | 21.3                     | 22.4                 | 21.4                   |
| 1.00E-07 | 7.59E-06            | 12720         | 24.6                 | 24.6                     | 25.8                 | 24.9                   |
| 1.00E-08 | 7.59E-07            | 1272          | 27.8                 | 27.8                     | 29.0                 | 28.1                   |
| 1.00E-09 | 7.59E-08            | 127           | 30.9                 | 30.9                     | 32.4                 | 31.5                   |
| 1.00E-10 | 7.59E-09            | 13            | 33.9                 | 35.3                     | 36.3                 | 35.0                   |
| 5.00E-11 | 3.80E-09            | 6             | 36.1                 | 36.0                     | 36.5                 | 36.7                   |
| 2.50E-11 | 1.90E-09            | 3             | 36.8                 | 36.4                     | 37.7                 | 35.6                   |

**Supplementary Table S2.** Limit of detection analysis of the *Ehrlichia*, *Anaplasma*, and *Rickettsia* species assays. Quantification cycle (Cq) values reported in mean from duplicate testing. Plasmid DNA concentrations not tested are represented by NA.

| Fold     | Plasmid DNA (ng/μl) | Target Copy # | <i>E. canis</i> Cq | <i>E. chaffeensis</i> Cq | <i>E. ewingii</i> Cq | <i>A. phagocytophilum</i> Cq | <i>R. rickettsii</i> Cq |
|----------|---------------------|---------------|--------------------|--------------------------|----------------------|------------------------------|-------------------------|
| 1        | 75.91               | 1.27E+11      | NA                 | NA                       | NA                   | NA                           | NA                      |
| 1.00E-06 | 7.59E-05            | 127,200       | 22.1               | 23.6                     | 23.2                 | 21.8                         | 22.1                    |
| 1.00E-07 | 7.59E-06            | 12,720        | 25.4               | 27.1                     | 26.6                 | 25.2                         | 25.5                    |
| 1.00E-08 | 7.59E-07            | 1,272         | 28.5               | 30.3                     | 30.1                 | 28.3                         | 28.8                    |
| 1.00E-09 | 7.59E-08            | 127           | 31.9               | 34.0                     | 33.7                 | 31.9                         | 32.2                    |
| 2.50E-10 | 1.90E-08            | 32            | 34.8               | 36.5                     | 35.8                 | 34.7                         | 33.7                    |
| 1.25E-10 | 9.49E-09            | 16            | 35.1               | 36.7                     | 37.1                 | 34.8                         | 35.9                    |

**Supplementary Table S3.** Limit of detection analysis of the *Babesia* species assays. Quantification cycle (Cq) values reported in mean from duplicate testing. Plasmid DNA concentrations not tested are represented by NA.

| Fold     | Plasmid DNA (ng/μl) | Target Copy # | <i>Babesia</i> spp. Cq |
|----------|---------------------|---------------|------------------------|
| 1        | 75.91               | 1.27E+11      | NA                     |
| 1.00E-06 | 7.59E-05            | 127,200       | 21.8                   |
| 1.00E-07 | 7.59E-06            | 12,720        | 24.6                   |
| 1.00E-08 | 7.59E-07            | 1,272         | 28.0                   |
| 1.00E-09 | 7.59E-08            | 127           | 32.0                   |
| 2.50E-10 | 1.90E-08            | 32            | 34.2                   |
| 1.25E-10 | 9.49E-09            | 16            | 35.6                   |

**Supplementary Table S4.** Limit of detection analysis of the Borrelial, Rickettsial, and Babesial layers evaluated in layerplex format. Quantification cycle (Cq) values reported in mean from duplicate testing. Plasmid DNA concentrations not tested are represented by NA.

| Fold     | Plasmid DNA (ng/μl) | Target Copy # | Borrelial Cq | Rickettsial Cq | Babesial Cq |
|----------|---------------------|---------------|--------------|----------------|-------------|
| 1        | 75.91               | 1.27E+11      | NA           | NA             | NA          |
| 1.00E-06 | 7.59E-05            | 127,200       | 23.2         | 23.0           | 22.1        |
| 1.00E-07 | 7.59E-06            | 12,720        | 26.0         | 25.7           | 24.8        |
| 1.00E-08 | 7.59E-07            | 1,272         | 29.1         | 29.0           | 28.1        |
| 1.00E-09 | 7.59E-08            | 127           | 32.8         | 32.5           | 31.5        |
| 2.50E-10 | 1.90E-08            | 32            | 34.6         | 34.4           | 33.5        |
| 1.25E-10 | 9.49E-09            | 16            | 35.5         | 35.4           | 34.4        |

**Supplementary Table S5.** GenBank® accession codes for the *16S rRNA* gene sequences of *Ehrlichia*, *Anaplasma*, and *Rickettsia* species. Sequences utilized for *in silico* analysis in Supplementary Fig. S1 are emphasized in bold.

| <b>Rickettsial Species</b> | <b>Isolate/Strain</b> | <b>GeneBank®</b> |
|----------------------------|-----------------------|------------------|
| <i>E. canis</i>            | NA                    | U26740           |
| <i>E. canis</i>            | GR78                  | EF011111         |
| <i>E. canis</i>            | GR21                  | EF011110         |
| <i>E. canis</i>            | Kiwi                  | HQ844983         |
| <i>E. canis</i>            | TWN1                  | EU106856         |
| <i>E. canis</i>            | Kagoshima             | AF536827         |
| <i>E. canis</i>            | NA                    | KM879929         |
| <i>E. canis</i>            | 171                   | KC479023         |
| <i>E. canis</i>            | 105                   | KC479022         |
| <i>E. canis</i>            | MSIA                  | JF429693         |
| <i>E. canis</i>            | B                     | JX893523         |
| <i>E. canis</i>            | A                     | JX893522         |
| <i>E. canis</i>            | NGR                   | JN982339         |
| <i>E. canis</i>            | NGR                   | JN982336         |
| <i>E. canis</i>            | NGR                   | JN622141         |
| <i>E. canis</i>            | TWN4                  | EU143637         |
| <i>E. canis</i>            | Nero                  | EU439944         |
| <i>E. canis</i>            | TWN                   | GU810149         |
| <i>E. canis</i>            | TWN3                  | EU143636         |
| <i>E. canis</i>            | TWN2                  | EU123923         |
| <i>E. canis</i>            | DT                    | HQ290362         |
| <i>E. canis</i>            | NA                    | EF139458         |
| <i>E. canis</i>            | TWN17                 | EU139493         |
| <i>E. canis</i>            | Kutahya               | AY621071         |
| <i>E. canis</i>            | TWN18                 | EU178797         |
| <i>E. canis</i>            | NA                    | DQ915970         |
| <i>E. canis</i>            | NA                    | AY394465         |
| <i>E. canis</i>            | VDE                   | AF373613         |
| <i>E. canis</i>            | VHE                   | AF373612         |
| <i>E. canis</i>            | Gxht67                | AF156786         |
| <i>E. canis</i>            | Gdt3                  | AF156785         |
| <i>E. canis</i>            | b2-15                 | KY594915         |
| <i>E. canis</i>            | WHBMXZ-124            | KX987326         |
| <i>E. canis</i>            | M66                   | KX180945         |
| <i>E. canis</i>            | NA                    | KR920044         |
| <b><i>E. canis</i></b>     | <b>Oklahoma</b>       | <b>NR_118741</b> |
| <i>E. canis</i>            | S3b                   | KJ659037         |
| <i>E. canis</i>            | TrKysEcan3            | KJ513197         |
| <i>E. canis</i>            | TrKysEcan2            | KJ513196         |
| <i>E. canis</i>            | TrKysEcan1            | KJ513194         |
| <i>E. canis</i>            | CMM-19-2002           | AB723711         |
| <i>E. canis</i>            | CMM-19-2006           | AB723712         |
| <i>E. canis</i>            | W-137J                | AB723710         |
| <i>E. canis</i>            | E-60                  | AB723709         |
| <i>E. canis</i>            | W-134                 | AB723708         |
| <i>E. canis</i>            | E-89J                 | AB723707         |
| <i>E. canis</i>            | Bareilly              | JX861392         |
| <i>E. canis</i>            | Brazil-CO2            | EF195135         |
| <i>E. canis</i>            | Brazil-CO1            | EF195134         |
| <i>E. canis</i>            | Hd48                  | GQ395381         |
| <i>E. canis</i>            | NA                    | M73221           |

---

|                              |                   |                 |
|------------------------------|-------------------|-----------------|
| <i>E. canis</i>              | NA                | M73226          |
| <i>E. canis</i>              | Hd22              | GQ395378        |
| <i>E. canis</i>              | Hd38-1            | GQ395380        |
| <i>E. canis</i>              | ECAN_Bkk_07       | EU263991        |
| <i>E. canis</i>              | NA                | AF162860        |
| <i>E. canis</i>              | Jake              | CP000107        |
| <i>E. canis</i>              | YZ-1              | CP025749        |
| <i>E. chaffeensis</i>        | X1                | KX505292        |
| <i>E. chaffeensis</i>        | Arkansas          | NR_074500       |
| <i>E. chaffeensis</i>        | NA                | AF147752        |
| <i>E. chaffeensis</i>        | NA                | U23503          |
| <i>E. chaffeensis</i>        | Arkansas          | NR_037059       |
| <i>E. chaffeensis</i>        | NA                | AF000721        |
| <b><i>E. chaffeensis</i></b> | <b>Arkansas</b>   | <b>AF416764</b> |
| <i>E. chaffeensis</i>        | NA                | U60476          |
| <i>E. chaffeensis</i>        | NA                | U86665          |
| <i>E. chaffeensis</i>        | NA                | U86664          |
| <i>E. chaffeensis</i>        | NA                | M73222          |
| <i>E. chaffeensis</i>        | West Paces        | CP007480        |
| <i>E. chaffeensis</i>        | Wakulla           | CP007479        |
| <i>E. chaffeensis</i>        | Saint Vincent     | CP007478        |
| <i>E. chaffeensis</i>        | Osceola           | CP007477        |
| <i>E. chaffeensis</i>        | Liberty           | CP007476        |
| <i>E. chaffeensis</i>        | Jax               | CP007475        |
| <i>E. chaffeensis</i>        | Heartland         | CP007473        |
| <i>E. chaffeensis</i>        | Arkansas          | CP000236        |
| <i>E. ewingii</i>            | Stillwater        | NR_044747       |
| <b><i>E. ewingii</i></b>     | <b>Stillwater</b> | <b>M73227</b>   |
| <i>E. ewingii</i>            | 95E9-TS           | U96436          |
| <i>E. ewingii</i>            | 95E7-Mk           | U96435          |
| <i>E. muris</i>              | AS145             | NR_025962       |
| <i>E. muris</i>              | AS145             | NR_121714       |
| <i>E. muris</i>              | T-388             | KU315171        |
| <i>E. muris</i>              | Est1709           | KU535865        |
| <i>E. muris</i>              | WI22              | HQ660491        |
| <i>E. muris</i>              | Ip16              | AY587608        |
| <i>E. muris</i>              | NA                | AB013009        |
| <i>E. muris</i>              | NA                | AB196302        |
| <i>E. muris</i>              | Kh-1550           | GU358692        |
| <i>E. muris</i>              | NA                | AB013008        |
| <i>E. muris</i>              | Nov-Ip205         | GU358691        |
| <i>E. muris</i>              | m12               | AB275137        |
| <i>E. muris</i>              | NA                | U15527          |
| <b><i>E. muris</i></b>       | <b>AS145</b>      | <b>CP006917</b> |
| <i>E. ruminantium</i>        | Welgevonden       | NR_074513       |
| <i>E. ruminantium</i>        | AaFT299           | KJ942239        |
| <i>E. ruminantium</i>        | AaFT77            | KJ942221        |
| <i>E. ruminantium</i>        | Aa2FT306          | KJ942213        |
| <i>E. ruminantium</i>        | SBF4              | KF786044        |
| <i>E. ruminantium</i>        | SBF1              | KF786042        |
| <i>E. ruminantium</i>        | Welgevonden       | NR_074155       |
| <i>E. ruminantium</i>        | MB9_04            | DQ640395        |
| <i>E. ruminantium</i>        | MB9_03            | DQ640394        |
| <i>E. ruminantium</i>        | Hmr4              | DQ640390        |
| <i>E. ruminantium</i>        | Sheep             | DQ640389        |
| <i>E. ruminantium</i>        | Umbanein          | DQ647616        |

---

|                              |                     |                 |
|------------------------------|---------------------|-----------------|
| <i>E. ruminantium</i>        | c-4                 | DQ482922        |
| <i>E. ruminantium</i>        | c-3                 | DQ482921        |
| <i>E. ruminantium</i>        | c-2                 | DQ482920        |
| <i>E. ruminantium</i>        | c-1                 | DQ482919        |
| <i>E. ruminantium</i>        | c-3                 | DQ482918        |
| <i>E. ruminantium</i>        | c-2                 | DQ482917        |
| <i>E. ruminantium</i>        | c-1                 | DQ482916        |
| <i>E. ruminantium</i>        | c-1                 | DQ482915        |
| <i>E. ruminantium</i>        | NA                  | U03777          |
| <i>E. ruminantium</i>        | NA                  | X62432          |
| <b><i>E. ruminantium</i></b> | <b>Welgevonden</b>  | <b>CR925678</b> |
| <i>E. ruminantium</i>        | Gardel              | CR925677        |
| <i>E. ruminantium</i>        | Welgevonden         | CR767821        |
| <i>E. ruminantium</i>        | Vista               | AF318022        |
| <i>E. ruminantium</i>        | Henrique            | AF318021        |
| <i>E. ruminantium</i>        | ribosomal           | AF069758        |
| <i>E. ruminantium</i>        | rRNA                | U03776          |
| <i>E. ruminantium</i>        | NA                  | X61659          |
| <i>E. ruminantium</i>        | S22                 | HQ908081        |
| <i>E. ruminantium</i>        | Kiswani             | DQ647615        |
| <i>A. phagocytophilum</i>    | 6952                | KY486261        |
| <i>A. phagocytophilum</i>    | 6097                | KY486259        |
| <i>A. phagocytophilum</i>    | 6403                | KY486258        |
| <i>A. phagocytophilum</i>    | 6403                | KY462831        |
| <i>A. phagocytophilum</i>    | CPLA-HS             | MG050134        |
| <i>A. phagocytophilum</i>    | DKRH-HS             | MG050133        |
| <i>A. phagocytophilum</i>    | ItalyIRH004711      | KY319198        |
| <i>A. phagocytophilum</i>    | Italy149-12B        | KY319197        |
| <i>A. phagocytophilum</i>    | ItalyIRH012411      | KY319196        |
| <i>A. phagocytophilum</i>    | ItalyIRH01221       | KY319195        |
| <i>A. phagocytophilum</i>    | ItalyIRH004811      | KY319194        |
| <i>A. phagocytophilum</i>    | ItalyH3th-28        | KY319193        |
| <i>A. phagocytophilum</i>    | JXARSA-32           | KU585968        |
| <i>A. phagocytophilum</i>    | JXARSA-2            | KU585967        |
| <i>A. phagocytophilum</i>    | JXARSA-15           | KU585966        |
| <i>A. phagocytophilum</i>    | HunChun17           | KX279357        |
| <i>A. phagocytophilum</i>    | RB3                 | KY458571        |
| <i>A. phagocytophilum</i>    | RS10556             | KY458570        |
| <i>A. phagocytophilum</i>    | Y_G14 16S           | KU705164        |
| <i>A. phagocytophilum</i>    | Y_C35 16S           | KU705163        |
| <i>A. phagocytophilum</i>    | Y_C34 16S           | KU705162        |
| <i>A. phagocytophilum</i>    | Y_A04 16S           | KU705161        |
| <i>A. phagocytophilum</i>    | I_BwReh33           | KU705160        |
| <i>A. phagocytophilum</i>    | X_BwReh32           | KU705159        |
| <i>A. phagocytophilum</i>    | 16S-25              | KU705130        |
| <i>A. phagocytophilum</i>    | W_BwRo6 1           | KU705129        |
| <i>A. phagocytophilum</i>    | S_BwRo5 1           | KU705128        |
| <i>A. phagocytophilum</i>    | W_BwRo4 1           | KU705127        |
| <i>A. phagocytophilum</i>    | 16S-30              | KU705126        |
| <i>A. phagocytophilum</i>    | W_BwRo2 1           | KU705125        |
| <i>A. phagocytophilum</i>    | Norway variant2, co | CP015376        |
| <i>A. phagocytophilum</i>    | ApGDrom1            | KF002508        |
| <i>A. phagocytophilum</i>    | AAIK4               | KR611719        |
| <i>A. phagocytophilum</i>    | AAIK3               | KR611718        |
| <i>A. phagocytophilum</i>    | AAIK2               | KR611717        |
| <i>A. phagocytophilum</i>    | AAIK1               | KR611716        |

|                                  |                 |                 |
|----------------------------------|-----------------|-----------------|
| <i>A. phagocytophilum</i>        | 14DRS           | KR092129        |
| <i>A. phagocytophilum</i>        | tick-EU329      | KM215231        |
| <i>A. phagocytophilum</i>        | tick-EU322      | KM215230        |
| <i>A. phagocytophilum</i>        | d-3216          | KM215224        |
| <i>A. phagocytophilum</i>        | Aa2FT11         | KJ942185        |
| <i>A. phagocytophilum</i>        | Aa2FT06         | KJ942183        |
| <i>A. phagocytophilum</i>        | gw1             | KF805344        |
| <i>A. phagocytophilum</i>        | Dog2            | CP006618        |
| <i>A. phagocytophilum</i>        | JMe             | CP006617        |
| <i>A. phagocytophilum</i>        | HZ2             | CP006616        |
| <i>A. phagocytophilum</i>        | sheep19         | KF293698        |
| <i>A. phagocytophilum</i>        | sheep28         | KF293697        |
| <i>A. phagocytophilum</i>        | sheep29         | KF293676        |
| <i>A. phagocytophilum</i>        | sheep54         | KF293675        |
| <i>A. phagocytophilum</i>        | sheep52         | KF293673        |
| <i>A. phagocytophilum</i>        | sheep50         | KF293671        |
| <i>A. phagocytophilum</i>        | sheep49         | KF293670        |
| <i>A. phagocytophilum</i>        | sheep48         | KF293669        |
| <i>A. phagocytophilum</i>        | Rus30-10        | HQ629911        |
| <i>A. phagocytophilum</i>        | Bel6-22-07      | HQ629915        |
| <i>A. phagocytophilum</i>        | BelBmi37        | HQ629914        |
| <i>A. phagocytophilum</i>        | Rus29-12        | HQ629912        |
| <i>A. phagocytophilum</i>        | HB-SZ-HGA-S02   | HQ171975        |
| <i>A. phagocytophilum</i>        | ZJ01/2008       | HM439430        |
| <i>A. phagocytophilum</i>        | Sv-Ip854        | HM366579        |
| <i>A. phagocytophilum</i>        | h997            | HM138366        |
| <i>A. phagocytophilum</i>        | KWDAP5          | GU556625        |
| <i>A. phagocytophilum</i>        | HLAP327         | GU064899        |
| <i>A. phagocytophilum</i>        | KWDAP2          | GU556622        |
| <i>A. phagocytophilum</i>        | KWDAP1          | GU556621        |
| <i>A. phagocytophilum</i>        | sheep_5010_EM   | GU236611        |
| <i>A. phagocytophilum</i>        | GC19            | GU111744        |
| <i>A. phagocytophilum</i>        | roe_deer_137_05 | GU236574        |
| <i>A. phagocytophilum</i>        | roe_deer_16     | GU236554        |
| <i>A. phagocytophilum</i>        | YN-XD-HGA-S131  | GQ500084        |
| <i>A. phagocytophilum</i>        | YN-XD-HGA-S103  | GQ500080        |
| <i>A. phagocytophilum</i>        | YN-XD-HGA-S102  | GQ500079        |
| <i>A. phagocytophilum</i>        | ZJ-TT-HGA-O37   | GQ500060        |
| <i>A. phagocytophilum</i>        | ZJ-TT-HGA-O35   | GQ500058        |
| <i>A. phagocytophilum</i>        | ZJ-TT-HGA-O23   | GQ500047        |
| <i>A. phagocytophilum</i>        | BJ-MY-HGA-S13   | GQ499986        |
| <i>A. phagocytophilum</i>        | BJ-MY-HGA-S2    | GQ499977        |
| <i>A. phagocytophilum</i>        | BJ-MY-HGA-S1    | GQ499956        |
| <i>A. phagocytophilum</i>        | AH-MG-HGA-S36   | GQ499928        |
| <i>A. phagocytophilum</i>        | China-C-Aa      | GQ412337        |
| <i>A. phagocytophilum</i>        | PoTiA2dt        | EU098007        |
| <i>A. phagocytophilum</i>        | PoTiA1dt        | EU098006        |
| <i>A. phagocytophilum</i>        | PoAnA1dt        | EF693890        |
| <i>A. phagocytophilum</i>        | EHR02           | EF217398        |
| <i>A. phagocytophilum</i>        | EHR1            | EF217397        |
| <i>A. phagocytophilum</i>        | AH-HGA-9        | EF473210        |
| <b><i>A. phagocytophilum</i></b> | <b>HZ</b>       | <b>CP000235</b> |
| <i>A. phagocytophilum</i>        | M20             | DQ361024        |
| <i>A. phagocytophilum</i>        | DBMGH           | AY886761        |
| <i>A. phagocytophilum</i>        | 474             | AF481852        |
| <i>A. phagocytophilum</i>        | 470             | AF481850        |

|                           |                |                 |
|---------------------------|----------------|-----------------|
| <i>A. phagocytophilum</i> | AP-CBHL        | AF470699        |
| <i>A. phagocytophilum</i> | 16S            | AF384214        |
| <i>A. phagocytophilum</i> | 16S            | AF384212        |
| <i>A. phagocytophilum</i> | Jilin-1        | DQ342324        |
| <i>A. phagocytophilum</i> | BV-1           | AY082656        |
| <i>A. phagocytophilum</i> | TXCTR3         | DQ088128        |
| <i>A. phagocytophilum</i> | WA-variant     | AY741095        |
| <i>A. phagocytophilum</i> | h-1148         | KM215222        |
| <b><i>A. platys</i></b>   | <b>Okinawa</b> | <b>AF536828</b> |
| <i>A. platys</i>          | D35            | KX792089        |
| <i>A. platys</i>          | 4              | KT982643        |
| <i>A. platys</i>          | QQQ            | KX447505        |
| <i>A. platys</i>          | RRR            | KX447502        |
| <i>A. platys</i>          | Rodo-p1-66     | JX976181        |
| <i>A. platys</i>          | A.pl.#87       | JQ396431        |
| <i>A. platys</i>          | Gigio          | EU439943        |
| <i>A. platys</i>          | NA             | EF139459        |
| <i>A. platys</i>          | YY36           | MF289478        |
| <i>A. platys</i>          | YY33           | MF289477        |
| <i>A. platys</i>          | b3-7           | KY594914        |
| <i>A. platys</i>          | dog-72         | LC269822        |
| <i>A. platys</i>          | dog-99         | LC269821        |
| <i>A. platys</i>          | dog-166        | LC269820        |
| <i>A. platys</i>          | WHBMXZ-126     | KX987336        |
| <i>A. platys</i>          | ZJARSA-8       | KU586183        |
| <i>A. platys</i>          | WHARSA-7       | KU586175        |
| <i>A. platys</i>          | WHANSL-27-1    | KU586172        |
| <i>A. platys</i>          | WHANSA-24-2    | KU586168        |
| <i>A. platys</i>          | WHAEAP-26      | KU586165        |
| <i>A. platys</i>          | WHAEAL-17-2    | KU586163        |
| <i>A. platys</i>          | JXARSA-29      | KU586161        |
| <i>A. platys</i>          | JXANSA-19      | KU586159        |
| <i>A. platys</i>          | WHANSE-2       | KU586124        |
| <i>A. platys</i>          | WHARSP-17      | KU586058        |
| <i>A. platys</i>          | WHARSL-30      | KU586051        |
| <i>A. platys</i>          | WHARSA-47-1    | KU586031        |
| <i>A. platys</i>          | WHARSA-14      | KU586028        |
| <i>A. platys</i>          | WHANSA-8       | KU586006        |
| <i>A. platys</i>          | WHANSA-7-4     | KU586001        |
| <i>A. platys</i>          | WHANSA-6-3     | KU585997        |
| <i>A. platys</i>          | WHANSA-45-1    | KU585989        |
| <i>A. platys</i>          | WHANSA-40      | KU585988        |
| <i>A. platys</i>          | M48A           | KX180946        |
| <i>A. platys</i>          | P30            | KX180944        |
| <i>A. platys</i>          | NA             | KY114935        |
| <i>A. platys</i>          | 3ax1           | KJ659045        |
| <i>A. platys</i>          | 2ax1           | KJ659044        |
| <i>A. platys</i>          | NA             | AY530806        |
| <i>A. platys</i>          | Okinawa        | AY077619        |
| <i>A. platys</i>          | NA             | AF303467        |
| <i>A. platys</i>          | NA             | AF399917        |
| <i>A. platys</i>          | NA             | AF287153        |
| <i>A. platys</i>          | NA             | AF286699        |
| <i>A. platys</i>          | NA             | AF156784        |
| <i>A. platys</i>          | NA             | M82801          |
| <i>A. marginale</i>       | BAGHS-B47      | MG018436        |

|                            |              |                 |
|----------------------------|--------------|-----------------|
| <i>A. marginale</i>        | Wayanad 17   | MG728098        |
| <i>A. marginale</i>        | TVM 3        | MG709131        |
| <i>A. marginale</i>        | Thrissur 8   | MG709056        |
| <i>A. marginale</i>        | Thrissur 6   | MG709054        |
| <i>A. marginale</i>        | Thrissur 5   | MG709053        |
| <i>A. marginale</i>        | WHANSA-6-2   | KU586171        |
| <i>A. marginale</i>        | WHAEAP-33    | KU586166        |
| <i>A. marginale</i>        | JXANSA-2     | KU586160        |
| <i>A. marginale</i>        | WHANSE-2-1   | KU586125        |
| <i>A. marginale</i>        | ZJCUTA-30    | KU586074        |
| <i>A. marginale</i>        | ZJCUTA-2     | KU586073        |
| <i>A. marginale</i>        | ZJCUTA-10    | KU586072        |
| <i>A. marginale</i>        | WHCUTA-25    | KU586066        |
| <i>A. marginale</i>        | WHARSP-30-2  | KU586062        |
| <i>A. marginale</i>        | WHARSP-19    | KU586059        |
| <i>A. marginale</i>        | WHARSL-38-1  | KU586056        |
| <i>A. marginale</i>        | WHARSA-47-2  | KU586032        |
| <i>A. marginale</i>        | WHANSL-8-1   | KU586022        |
| <i>A. marginale</i>        | WHANSL-27-2  | KU586017        |
| <i>A. marginale</i>        | WHANSL-11-1  | KU586012        |
| <i>A. marginale</i>        | WHANSA-92    | KU586011        |
| <i>A. marginale</i>        | WHANSA-8-2   | KU586005        |
| <i>A. marginale</i>        | WHANSA-60-2  | KU585998        |
| <i>A. marginale</i>        | WHANSA-53-2  | KU585995        |
| <i>A. marginale</i>        | WHANSA-48    | KU585992        |
| <i>A. marginale</i>        | WHANSA-45-2  | KU585990        |
| <i>A. marginale</i>        | JXANSA-8     | KU585964        |
| <i>A. marginale</i>        | JXANSA-34    | KU585963        |
| <i>A. marginale</i>        | JXANSA-24    | KU585960        |
| <i>A. marginale</i>        | Uganda MT27  | KU686794        |
| <i>A. marginale</i>        | Uganda MT28  | KU686793        |
| <i>A. marginale</i>        | Uganda MT34  | KU686792        |
| <i>A. marginale</i>        | Uganda MT30  | KU686791        |
| <i>A. marginale</i>        | Uganda MT29  | KU686790        |
| <i>A. marginale</i>        | Uganda MT31  | KU686789        |
| <i>A. marginale</i>        | Uganda MT38  | KU686788        |
| <i>A. marginale</i>        | Uganda KT7   | KU686787        |
| <i>A. marginale</i>        | Uganda MT32  | KU686786        |
| <i>A. marginale</i>        | Uganda MT37  | KU686782        |
| <i>A. marginale</i>        | Uganda MT35  | KU686781        |
| <i>A. marginale</i>        | Uganda MT33  | KU686780        |
| <i>A. marginale</i>        | Uganda KT9   | KU686779        |
| <i>A. marginale</i>        | Uganda MT42  | KU686778        |
| <i>A. marginale</i>        | Uganda KT10  | KU686777        |
| <i>A. marginale</i>        | Uganda KT6   | KU686776        |
| <i>A. marginale</i>        | Uganda MT39  | KU686775        |
| <i>A. marginale</i>        | Uganda MT36  | KU686774        |
| <i>A. marginale</i>        | AM-SAR2011   | KP877314        |
| <b><i>A. marginale</i></b> | <b>Zaria</b> | <b>KJ095114</b> |
| <i>A. marginale</i>        | NA           | AB916498        |
| <i>A. marginale</i>        | NA           | LC007100        |
| <i>A. marginale</i>        | NA           | AB916499        |
| <i>A. marginale</i>        | Sivas SS101  | KJ183086        |
| <i>A. marginale</i>        | Sivas SS84   | KJ183083        |
| <i>A. marginale</i>        | NA           | CP006847        |
| <i>A. marginale</i>        | NA           | CP006846        |



---

|                     |                |          |
|---------------------|----------------|----------|
| <i>A. marginale</i> | C6A            | JQ839012 |
| <i>A. marginale</i> | C7D            | JQ839011 |
| <i>A. marginale</i> | 5C             | JQ839009 |
| <i>A. marginale</i> | 4C             | JQ839008 |
| <i>A. marginale</i> | ZJ02/2009      | HM439433 |
| <i>A. marginale</i> | K1             | GU129918 |
| <i>A. marginale</i> | NA             | FJ155998 |
| <i>A. marginale</i> | NA             | CP001079 |
| <i>A. marginale</i> | Ishigaki-2007  | FJ226454 |
| <i>A. marginale</i> | TG26           | DQ000617 |
| <i>A. marginale</i> | IG42           | DQ000616 |
| <i>A. marginale</i> | GP4            | DQ000615 |
| <i>A. marginale</i> | BS19           | DQ000614 |
| <i>A. marginale</i> | BS16           | DQ000613 |
| <i>A. marginale</i> | NA             | AY048816 |
| <i>A. marginale</i> | Hongan buffalo | DQ341369 |
| <i>A. marginale</i> | 16S            | AJ633048 |
| <i>A. marginale</i> | Zimbabwe       | AF414878 |
| <i>A. marginale</i> | Uruguay        | AF414877 |
| <i>A. marginale</i> | non-tailed     | AF414875 |
| <i>A. marginale</i> | F12            | AF414874 |
| <i>A. marginale</i> | Veld           | AF414873 |
| <i>A. marginale</i> | Eland          | AF414872 |
| <i>A. marginale</i> | South Africa   | AF414871 |
| <i>A. marginale</i> | NA             | AF311303 |
| <i>A. marginale</i> | South Idaho    | AF309868 |
| <i>A. marginale</i> | Virginia       | AF309866 |
| <i>A. marginale</i> | NA             | CP000030 |
| <i>A. marginale</i> | 58             | M60313   |
| <i>A. marginale</i> | WHARSL-28      | KU586048 |
| <i>A. marginale</i> | ZJCUTA-6       | KU586076 |
| <i>A. marginale</i> | ZJCUTA-5       | KU586075 |
| <i>A. marginale</i> | WHARSA-30      | KU586030 |
| <i>A. marginale</i> | WHANSL-41      | KU586021 |
| <i>A. marginale</i> | WHCUTA-8       | KU586067 |
| <i>A. marginale</i> | WHANSL-24-1    | KU586015 |
| <i>A. marginale</i> | WHAEAL-17-1    | KU585973 |
| <i>A. marginale</i> | WHANSA-36      | KU585984 |
| <i>A. marginale</i> | CPY31          | KM009068 |
| <i>A. marginale</i> | AMSP4-MDK2     | KX989511 |
| <i>A. marginale</i> | AMSP4-MDK1     | KX989510 |
| <i>A. marginale</i> | HiP_5AM        | KY305599 |
| <i>A. marginale</i> | KNP_582AM      | KY305598 |
| <i>A. ovis</i>      | BAGHS-B47      | MG018436 |
| <i>A. ovis</i>      | Wayanad 17     | MG728098 |
| <i>A. ovis</i>      | TVM 3          | MG709131 |
| <i>A. ovis</i>      | Thrissur 8     | MG709056 |
| <i>A. ovis</i>      | Thrissur 6     | MG709054 |
| <i>A. ovis</i>      | Thrissur 5     | MG709053 |
| <i>A. ovis</i>      | WHANSA-6-2     | KU586171 |
| <i>A. ovis</i>      | WHAEAP-33      | KU586166 |
| <i>A. ovis</i>      | JXANSA-2       | KU586160 |
| <i>A. ovis</i>      | WHANSE-2-1     | KU586125 |
| <i>A. ovis</i>      | ZJCUTA-30      | KU586074 |
| <i>A. ovis</i>      | ZJCUTA-2       | KU586073 |
| <i>A. ovis</i>      | ZJCUTA-10      | KU586072 |

---

---

|                       |               |                 |
|-----------------------|---------------|-----------------|
| <i>A. ovis</i>        | WHCUTA-25     | KU586066        |
| <i>A. ovis</i>        | WHARSP-30-2   | KU586062        |
| <i>A. ovis</i>        | WHARSP-19     | KU586059        |
| <i>A. ovis</i>        | WHARSL-38-1   | KU586056        |
| <i>A. ovis</i>        | WHARSA-47-2   | KU586032        |
| <i>A. ovis</i>        | WHANSL-8-1    | KU586022        |
| <i>A. ovis</i>        | WHANSL-27-2   | KU586017        |
| <i>A. ovis</i>        | WHANSL-11-1   | KU586012        |
| <i>A. ovis</i>        | WHANSA-92     | KU586011        |
| <i>A. ovis</i>        | WHANSA-8-2    | KU586005        |
| <i>A. ovis</i>        | WHANSA-60-2   | KU585998        |
| <i>A. ovis</i>        | WHANSA-53-2   | KU585995        |
| <i>A. ovis</i>        | WHANSA-48     | KU585992        |
| <i>A. ovis</i>        | WHANSA-45-2   | KU585990        |
| <i>A. ovis</i>        | JXANSA-8      | KU585964        |
| <i>A. ovis</i>        | JXANSA-34     | KU585963        |
| <i>A. ovis</i>        | JXANSA-24     | KU585960        |
| <i>A. ovis</i>        | Uganda MT27   | KU686794        |
| <i>A. ovis</i>        | Uganda MT28   | KU686793        |
| <i>A. ovis</i>        | Uganda MT34   | KU686792        |
| <i>A. ovis</i>        | Uganda MT30   | KU686791        |
| <i>A. ovis</i>        | Uganda MT29   | KU686790        |
| <i>A. ovis</i>        | Uganda MT31   | KU686789        |
| <i>A. ovis</i>        | Uganda MT38   | KU686788        |
| <i>A. ovis</i>        | Uganda KT7    | KU686787        |
| <i>A. ovis</i>        | Uganda MT32   | KU686786        |
| <i>A. ovis</i>        | Uganda MT37   | KU686782        |
| <i>A. ovis</i>        | Uganda MT35   | KU686781        |
| <i>A. ovis</i>        | Uganda MT33   | KU686780        |
| <i>A. ovis</i>        | Uganda KT9    | KU686779        |
| <i>A. ovis</i>        | Uganda MT42   | KU686778        |
| <i>A. ovis</i>        | Uganda KT10   | KU686777        |
| <i>A. ovis</i>        | Uganda KT6    | KU686776        |
| <i>A. ovis</i>        | Uganda MT39   | KU686775        |
| <i>A. ovis</i>        | Uganda MT36   | KU686774        |
| <i>A. ovis</i>        | AM-SAR2011    | KP877314        |
| <i>A. ovis</i>        | Zaria         | KJ095114        |
| <i>A. ovis</i>        | NA            | AB916498        |
| <i>A. ovis</i>        | NA            | LC007100        |
| <i>A. ovis</i>        | NA            | AB916499        |
| <i>A. ovis</i>        | Sivas SS101   | KJ183086        |
| <i>A. ovis</i>        | Sivas SS84    | KJ183083        |
| <i>A. ovis</i>        | NA            | CP006847        |
| <i>A. ovis</i>        | NA            | CP006846        |
| <i>A. ovis</i>        | C6A           | JQ839012        |
| <i>A. ovis</i>        | C7D           | JQ839011        |
| <i>A. ovis</i>        | 5C            | JQ839009        |
| <i>A. ovis</i>        | 4C            | JQ839008        |
| <i>A. ovis</i>        | ZJ02/2009     | HM439433        |
| <b><i>A. ovis</i></b> | <b>K1</b>     | <b>GU129918</b> |
| <i>A. ovis</i>        | NA            | FJ155998        |
| <i>A. ovis</i>        | NA            | CP001079        |
| <i>A. ovis</i>        | Ishigaki-2007 | FJ226454        |
| <i>A. ovis</i>        | TG26          | DQ000617        |
| <i>A. ovis</i>        | IG42          | DQ000616        |
| <i>A. ovis</i>        | GP4           | DQ000615        |

---

|                           |                     |                 |
|---------------------------|---------------------|-----------------|
| <i>A. ovis</i>            | BS19                | DQ000614        |
| <i>A. ovis</i>            | BS16                | DQ000613        |
| <i>A. ovis</i>            | NA                  | AY048816        |
| <i>A. ovis</i>            | Hongan buffalo      | DQ341369        |
| <i>A. ovis</i>            | 16S                 | AJ633048        |
| <i>A. ovis</i>            | Zimbabwe            | AF414878        |
| <i>A. ovis</i>            | Uruguay             | AF414877        |
| <i>A. ovis</i>            | non-tailed          | AF414875        |
| <i>A. ovis</i>            | F12                 | AF414874        |
| <i>A. ovis</i>            | Veld                | AF414873        |
| <i>A. ovis</i>            | Eland               | AF414872        |
| <i>A. ovis</i>            | South Africa        | AF414871        |
| <i>A. ovis</i>            | NA                  | AF311303        |
| <i>A. ovis</i>            | South Idaho         | AF309868        |
| <i>A. ovis</i>            | Virginia            | AF309866        |
| <i>A. ovis</i>            | NA                  | CP000030        |
| <i>A. ovis</i>            | 58                  | M60313          |
| <i>A. ovis</i>            | WHARSL-28           | KU586048        |
| <i>A. ovis</i>            | ZJCUTA-6            | KU586076        |
| <i>A. ovis</i>            | ZJCUTA-5            | KU586075        |
| <i>A. ovis</i>            | WHARSA-30           | KU586030        |
| <i>A. ovis</i>            | WHANSL-41           | KU586021        |
| <i>A. ovis</i>            | WHCUTA-8            | KU586067        |
| <i>A. ovis</i>            | WHANSL-24-1         | KU586015        |
| <i>A. ovis</i>            | WHAEAL-17-1         | KU585973        |
| <i>A. ovis</i>            | WHANSA-36           | KU585984        |
| <i>A. ovis</i>            | CPY31               | KM009068        |
| <i>A. ovis</i>            | AMSP4-MDK2          | KX989511        |
| <i>A. ovis</i>            | AMSP4-MDK1          | KX989510        |
| <i>A. ovis</i>            | HiP_5AM             | KY305599        |
| <i>A. ovis</i>            | KNP_582AM           | KY305598        |
| <i>A. centrale</i>        | NA                  | AF283007        |
| <i>A. centrale</i>        | 16                  | EF520690        |
| <i>A. centrale</i>        | 14                  | EF520689        |
| <i>A. centrale</i>        | 8                   | EF520688        |
| <i>A. centrale</i>        | 1                   | EF520687        |
| <i>A. centrale</i>        | CC                  | EF520686        |
| <b><i>A. centrale</i></b> | <b>South Africa</b> | <b>AF414869</b> |
| <i>A. centrale</i>        | Vaccine             | AF414868        |
| <i>A. centrale</i>        | NA                  | AB211164        |
| <i>A. centrale</i>        | LP17                | MF289482        |
| <i>A. centrale</i>        | LP10                | MF289481        |
| <i>A. centrale</i>        | JJ5                 | MF289480        |
| <i>A. centrale</i>        | ZJ68                | KP062966        |
| <i>A. centrale</i>        | ZJ64                | KP062965        |
| <i>A. centrale</i>        | ZJ62                | KP062964        |
| <i>A. centrale</i>        | Uganda KT5          | KU686784        |
| <i>A. centrale</i>        | Uganda KT8          | KU686783        |
| <i>A. centrale</i>        | C4B                 | JQ839010        |
| <i>A. centrale</i>        | HIP/A8/e            | KC189842        |
| <i>A. centrale</i>        | HIP/A8/d            | KC189841        |
| <i>A. centrale</i>        | HIP/A8/c            | KC189840        |
| <i>A. centrale</i>        | NA                  | AB588977        |
| <i>A. centrale</i>        | HLAC222             | GU064903        |
| <i>A. centrale</i>        | NA                  | AF318944        |
| <i>A. centrale</i>        | Israel              | AF309869        |

|                        |                  |                 |
|------------------------|------------------|-----------------|
| <i>A. bovis</i>        | Y258             | KY425447        |
| <i>A. bovis</i>        | Y257             | KY425445        |
| <i>A. bovis</i>        | Y201             | KY425441        |
| <i>A. bovis</i>        | Y197             | KY425439        |
| <i>A. bovis</i>        | Y196             | KY425435        |
| <i>A. bovis</i>        | Y111             | KY425433        |
| <i>A. bovis</i>        | Y102             | KY425431        |
| <i>A. bovis</i>        | Y85              | KY425429        |
| <i>A. bovis</i>        | Y83              | KY425426        |
| <i>A. bovis</i>        | Y59              | KY425423        |
| <i>A. bovis</i>        | Y11              | KY425420        |
| <b><i>A. bovis</i></b> | <b>Zhongxian</b> | <b>FJ169957</b> |
| <i>A. bovis</i>        | SG176_HL         | EU181143        |
| <i>A. bovis</i>        | SG175_HL         | EU181142        |
| <i>A. bovis</i>        | Tottori-97       | HM131218        |
| <i>A. bovis</i>        | Hiroshima-Z27    | HM131217        |
| <i>A. bovis</i>        | ribosomal        | AY144729        |
| <i>A. bovis</i>        | FL17             | MF289479        |
| <i>A. bovis</i>        | Shandong JN2     | KY242455        |
| <i>A. bovis</i>        | WHHLHP-119       | KX987337        |
| <i>A. bovis</i>        | WHARSL-38-2      | KU586176        |
| <i>A. bovis</i>        | WHARSA-40-2      | KU586174        |
| <i>A. bovis</i>        | WHANSA-6-1       | KU586170        |
| <i>A. bovis</i>        | WHANSA-24-1      | KU586167        |
| <i>A. bovis</i>        | WHANSL-8         | KU586023        |
| <i>A. bovis</i>        | 20/China/2013    | KP314253        |
| <i>A. bovis</i>        | 19/China/2013    | KP314252        |
| <i>A. bovis</i>        | 18/China/2013    | KP314251        |
| <i>A. bovis</i>        | 17/China/2013    | KP314250        |
| <i>A. bovis</i>        | 15/China/2013    | KP314249        |
| <i>A. bovis</i>        | 14/China/2013    | KP314248        |
| <i>A. bovis</i>        | 13/China/2013    | KP314247        |
| <i>A. bovis</i>        | 12/China/2013    | KP314246        |
| <i>A. bovis</i>        | 11/China/2013    | KP314245        |
| <i>A. bovis</i>        | 10/China/2013    | KP314244        |
| <i>A. bovis</i>        | 9/China/2013     | KP314243        |
| <i>A. bovis</i>        | 8/China/2013     | KP314242        |
| <i>A. bovis</i>        | 6/China/2013     | KP314240        |
| <i>A. bovis</i>        | 4/China/2013     | KP314239        |
| <i>A. bovis</i>        | 1/China/2013     | KP314236        |
| <i>A. bovis</i>        | ZJ98             | KP062959        |
| <i>A. bovis</i>        | ZJ69             | KP062958        |
| <i>A. bovis</i>        | ZJ66             | KP062957        |
| <i>A. bovis</i>        | ZJ54             | KP062956        |
| <i>A. bovis</i>        | ZJ46             | KP062955        |
| <i>A. bovis</i>        | ZJ15             | KP062954        |
| <i>A. bovis</i>        | ZJ12             | KP062953        |
| <i>A. bovis</i>        | TYM19            | LC012818        |
| <i>A. bovis</i>        | TYM14            | LC012817        |
| <i>A. bovis</i>        | KUM7             | LC012813        |
| <i>A. bovis</i>        | KUM5             | LC012812        |
| <i>A. bovis</i>        | KOC4             | LC012811        |
| <i>A. bovis</i>        | 115              | KM114613        |
| <i>A. bovis</i>        | 85               | KM114612        |
| <i>A. bovis</i>        | 88               | KM114611        |
| <i>A. bovis</i>        | sika35           | LC060988        |

|                             |                   |               |
|-----------------------------|-------------------|---------------|
| <i>A. bovis</i>             | CMS-34_20111224   | AB983439      |
| <i>A. bovis</i>             | CFT-27_20111223   | AB983438      |
| <i>A. bovis</i>             | 3ay               | KJ659043      |
| <i>A. bovis</i>             | 3ax               | KJ659042      |
| <i>A. bovis</i>             | 2ay               | KJ659041      |
| <i>A. bovis</i>             | 2ax               | KJ659040      |
| <i>A. bovis</i>             | CFT-27-2010       | AB723716      |
| <i>A. bovis</i>             | CFT-27-2009       | AB723715      |
| <i>A. bovis</i>             | CFT-24-2010       | AB723714      |
| <i>A. bovis</i>             | CFT-24-2009       | AB723713      |
| <i>A. bovis</i>             | Am-vole57         | JX092098      |
| <i>A. bovis</i>             | China-chipmunk25  | JX092096      |
| <i>A. bovis</i>             | Kh-Hc215          | JX092094      |
| <i>A. bovis</i>             | Am-Hc60           | JX092092      |
| <i>A. bovis</i>             | Ab38B             | AB588969      |
| <i>A. bovis</i>             | Ab59B             | AB588965      |
| <i>A. bovis</i>             | raccoon513        | GU937023      |
| <i>A. bovis</i>             | raccoon510        | GU937022      |
| <i>A. bovis</i>             | raccoon501        | GU937021      |
| <i>A. bovis</i>             | raccoon499        | GU937020      |
| <i>A. bovis</i>             | raccoon493        | GU937019      |
| <i>A. bovis</i>             | raccoon490        | GU937018      |
| <i>A. bovis</i>             | raccoon464        | GU937017      |
| <i>A. bovis</i>             | raccoon462        | GU937016      |
| <i>A. bovis</i>             | raccoon458        | GU937015      |
| <i>A. bovis</i>             | raccoon453        | GU937014      |
| <i>A. bovis</i>             | raccoon439        | GU937013      |
| <i>A. bovis</i>             | raccoon426        | GU937012      |
| <i>A. bovis</i>             | raccoon109        | GU937011      |
| <i>A. bovis</i>             | Yu12              | JN558829      |
| <i>A. bovis</i>             | R7                | JN558828      |
| <i>A. bovis</i>             | G55               | JN558825      |
| <i>A. bovis</i>             | G49               | JN558824      |
| <i>A. bovis</i>             | G21               | JN558823      |
| <i>A. bovis</i>             | G1                | JN558822      |
| <i>A. bovis</i>             | B7                | JN558819      |
| <i>A. bovis</i>             | YX4               | JN558817      |
| <i>A. bovis</i>             | G41               | HQ913646      |
| <i>A. bovis</i>             | ES1090            | HQ913645      |
| <i>A. bovis</i>             | ES1019            | HQ913644      |
| <i>A. bovis</i>             | HLAB352           | GU064902      |
| <i>A. bovis</i>             | HLAB187           | GU064901      |
| <i>A. bovis</i>             | AB-KGHL           | AF470698      |
| <i>A. bovis</i>             | NA                | U03775        |
| <b><i>R. typhi</i></b>      | <b>Wilmington</b> | <b>L36221</b> |
| <i>R. typhi</i>             | NA                | M20499        |
| <i>R. typhi</i>             | Wilmington        | U12463        |
| <i>R. rickettsii</i>        | NA                | M21293        |
| <b><i>R. rickettsii</i></b> | <b>R</b>          | <b>L36217</b> |
| <i>R. rickettsii</i>        | 1995H02           | DQ150694      |
| <i>R. rickettsii</i>        | 1995H01           | DQ150691      |
| <i>R. rickettsii</i>        | 1994C02           | DQ150688      |
| <i>R. rickettsii</i>        | 1991C03           | DQ150685      |
| <i>R. rickettsii</i>        | 1989C01           | DQ150682      |
| <i>R. rickettsii</i>        | NA                | U11021        |

**Supplementary Table S6.** GenBank® accession codes for the 18S rRNA gene sequences of *Babesia* and *Theileria* species. Sequences utilized for *in silico* analysis in Supplementary Fig. S1 are emphasized in bold.

| <b><i>Babesia</i> Species</b> | <b>Isolate/Strain</b> | <b>GeneBank®</b> |
|-------------------------------|-----------------------|------------------|
| <i>B. canis vogeli</i>        | NA                    | HM590440         |
| <i>B. canis vogeli</i>        | NA                    | AY072925         |
| <i>B. canis vogeli</i>        | TWN2                  | HQ148664         |
| <i>B. canis vogeli</i>        | TWN1                  | HQ148663         |
| <i>B. canis vogeli</i>        | 2B-158459             | KY290979         |
| <i>B. canis vogeli</i>        | 192704                | KY290978         |
| <i>B. canis vogeli</i>        | 105796                | KY290977         |
| <i>B. canis vogeli</i>        | 59239                 | KY290976         |
| <i>B. canis vogeli</i>        | dog 102               | KT323936         |
| <i>B. canis vogeli</i>        | cat 100               | KT323935         |
| <i>B. canis vogeli</i>        | dog 94                | KT323934         |
| <i>B. canis vogeli</i>        | dog 86                | KT323933         |
| <i>B. canis vogeli</i>        | cat 73                | KT323932         |
| <i>B. canis vogeli</i>        | Belem Bv02            | KT333456         |
| <i>B. canis vogeli</i>        | Dog#149               | JX871891         |
| <i>B. canis vogeli</i>        | Dog#44                | JX304683         |
| <i>B. canis vogeli</i>        | Dog#31                | JX304682         |
| <i>B. canis vogeli</i>        | Dog#26                | JX304681         |
| <i>B. canis vogeli</i>        | Dog#23                | JX304680         |
| <i>B. canis vogeli</i>        | Dog#22                | JX304679         |
| <i>B. canis vogeli</i>        | Dog#19                | JX304677         |
| <i>B. canis vogeli</i>        | Guangxi               | KJ939326         |
| <i>B. canis vogeli</i>        | SK-011                | JX112785         |
| <i>B. canis vogeli</i>        | RO/FMVB/B/9           | HQ662635         |
| <i>B. canis vogeli</i>        | NA                    | JF825145         |
| <i>B. canis vogeli</i>        | dog                   | AY150061         |
| <i>B. canis vogeli</i>        | NA                    | EU084681         |
| <b><i>B. canis vogeli</i></b> | <b>Venezuela</b>      | <b>DQ297390</b>  |
| <i>B. canis vogeli</i>        | Spain 1               | DQ439545         |
| <i>B. canis vogeli</i>        | USA                   | AY371198         |
| <i>B. canis vogeli</i>        | Egypt                 | AY371197         |
| <i>B. canis vogeli</i>        | Brazil                | AY371196         |
| <i>B. canis vogeli</i>        | Brazil                | AY371195         |
| <i>B. canis vogeli</i>        | Brazil                | AY371194         |
| <i>B. canis canis</i>         | Dog-1                 | KT008057         |
| <i>B. canis canis</i>         | BccTR2                | KF499115         |
| <i>B. canis canis</i>         | 2                     | EU622793         |
| <i>B. canis canis</i>         | 1                     | EU622792         |
| <i>B. canis canis</i>         | NA                    | AY072926         |
| <i>B. canis canis</i>         | Bd6-2                 | AY962187         |
| <i>B. canis canis</i>         | Bd6-1                 | AY962186         |
| <i>B. canis canis</i>         | NA                    | AY649326         |
| <b><i>B. canis canis</i></b>  | <b>D5</b>             | <b>AY527063</b>  |
| <i>B. canis canis</i>         | 43 ldrf               | DQ869308         |
| <i>B. canis canis</i>         | dog                   | DQ869307         |
| <i>B. canis canis</i>         | Dog#5                 | KC593879         |
| <i>B. canis canis</i>         | Dog#1                 | KC593878         |
| <i>B. canis canis</i>         | Dog#1                 | KC593877         |
| <i>B. canis canis</i>         | 204A/13b              | KP216422         |
| <i>B. canis canis</i>         | RO/FMVB/B/7           | HQ662634         |
| <i>B. canis canis</i>         | BCC2                  | FJ209025         |

|                              |                     |                 |
|------------------------------|---------------------|-----------------|
| <i>B. canis canis</i>        | BBC1                | FJ209024        |
| <i>B. canis canis</i>        | NA                  | EU152128        |
| <i>B. canis canis</i>        | NA                  | AY321119        |
| <b><i>B. canis rossi</i></b> | <b>Dog-76</b>       | <b>DQ111764</b> |
| <i>B. canis rossi</i>        | Dog-74              | DQ111763        |
| <i>B. canis rossi</i>        | Dog-69              | DQ111762        |
| <i>B. canis rossi</i>        | Dog-55              | DQ111761        |
| <i>B. canis rossi</i>        | Dog-44              | DQ111760        |
| <i>B. canis rossi</i>        | RLB1501/cl3         | KY463434        |
| <i>B. canis rossi</i>        | RLB1535/cl1         | KY463433        |
| <i>B. canis rossi</i>        | RLB1501/cl2         | KY463432        |
| <i>B. canis rossi</i>        | RLB1501/cl1         | KY463431        |
| <i>B. canis rossi</i>        | RLB1535/cl2         | KY463430        |
| <i>B. canis rossi</i>        | RLB1535/cl3         | KY463429        |
| <i>B. canis rossi</i>        | N4                  | AB935166        |
| <i>B. canis rossi</i>        | N3                  | AB935165        |
| <i>B. canis rossi</i>        | N2                  | AB935164        |
| <i>B. canis rossi</i>        | N1                  | AB935163        |
| <i>B. canis rossi</i>        | RLB67               | JQ613105        |
| <i>B. canis rossi</i>        | RLB42               | JQ613104        |
| <i>B. canis rossi</i>        | Dog#127, #135       | AB303075        |
| <i>B. canis rossi</i>        | Dog#25, #354, #398  | AB303074        |
| <i>B. canis rossi</i>        | Dog#23              | AB303073        |
| <i>B. canis rossi</i>        | Dog#8               | AB303072        |
| <i>B. canis rossi</i>        | Dog#2               | AB303071        |
| <i>B. canis rossi</i>        | NA                  | KC453992        |
| <i>B. gibsoni</i>            | 1-1665              | KC461261        |
| <i>B. gibsoni</i>            | Yamaguchi dog-5672  | AY077720        |
| <i>B. gibsoni</i>            | CMVL-06/2013/Chopin | KP901253        |
| <i>B. gibsoni</i>            | Assam 2             | KF928958        |
| <i>B. gibsoni</i>            | Ludhiana 3          | KF511956        |
| <i>B. gibsoni</i>            | Ludhiana 2          | KF511955        |
| <i>B. gibsoni</i>            | Kolkata 2           | KF171474        |
| <i>B. gibsoni</i>            | Kolkata 3           | KF171473        |
| <b><i>B. gibsoni</i></b>     | <b>Siliguri</b>     | <b>KF171471</b> |
| <i>B. gibsoni</i>            | Dehradoon           | KF171470        |
| <i>B. gibsoni</i>            | Kolkata             | KJ142323        |
| <i>B. gibsoni</i>            | CMVL-05/2013/Kiki   | KF878947        |
| <i>B. gibsoni</i>            | CMVL-01/2013/Mahesh | KF878943        |
| <i>B. gibsoni</i>            | 218/Assam           | KF112075        |
| <i>B. gibsoni</i>            | 178/Assam           | KF112074        |
| <i>B. gibsoni</i>            | TWN5                | FJ769388        |
| <i>B. gibsoni</i>            | TWN4                | FJ769387        |
| <i>B. gibsoni</i>            | TWN3                | FJ769386        |
| <i>B. gibsoni</i>            | Bab/Asm-QM/11/Ind   | KF606876        |
| <i>B. gibsoni</i>            | Bab/Asm-41/11/Ind   | KF606867        |
| <i>B. gibsoni</i>            | Johor 314           | KU500921        |
| <i>B. gibsoni</i>            | Pahang7             | KU500920        |
| <i>B. gibsoni</i>            | Johor 282           | KU500919        |
| <i>B. gibsoni</i>            | Sarawak 40          | KU500918        |
| <i>B. gibsoni</i>            | Sarawak 18          | KU500917        |
| <i>B. gibsoni</i>            | Selangor 53         | KU500916        |
| <i>B. gibsoni</i>            | Sabah24             | KU500915        |
| <i>B. gibsoni</i>            | WH123               | KP666168        |
| <i>B. gibsoni</i>            | WH121               | KP666167        |
| <i>B. gibsoni</i>            | WH120               | KP666166        |

---

|                   |              |          |
|-------------------|--------------|----------|
| <i>B. gibsoni</i> | WH114        | KP666165 |
| <i>B. gibsoni</i> | WH110        | KP666164 |
| <i>B. gibsoni</i> | WH91         | KP666163 |
| <i>B. gibsoni</i> | WH87         | KP666162 |
| <i>B. gibsoni</i> | WH82         | KP666161 |
| <i>B. gibsoni</i> | WH71         | KP666160 |
| <i>B. gibsoni</i> | WH61         | KP666159 |
| <i>B. gibsoni</i> | WH58         | KP666158 |
| <i>B. gibsoni</i> | WH56         | KP666157 |
| <i>B. gibsoni</i> | WH54         | KP666156 |
| <i>B. gibsoni</i> | WH35         | KP666155 |
| <i>B. gibsoni</i> | BD37         | LC008285 |
| <i>B. gibsoni</i> | BD05         | LC008284 |
| <i>B. gibsoni</i> | BD02         | LC006968 |
| <i>B. gibsoni</i> | Punjab       | KC954653 |
| <i>B. gibsoni</i> | Kolkata-1    | KC811803 |
| <i>B. gibsoni</i> | Assam        | KC811802 |
| <i>B. gibsoni</i> | Bareilly-1   | KC811801 |
| <i>B. gibsoni</i> | TWN5         | JQ710685 |
| <i>B. gibsoni</i> | KOR07-20     | EU430494 |
| <i>B. gibsoni</i> | KOR06-104    | EU430493 |
| <i>B. gibsoni</i> | KOR06-102    | EU430492 |
| <i>B. gibsoni</i> | KOR0685      | EU430491 |
| <i>B. gibsoni</i> | KOR0675      | EU430490 |
| <i>B. gibsoni</i> | KOR0674      | EU430489 |
| <i>B. gibsoni</i> | KOR0656      | EU430488 |
| <i>B. gibsoni</i> | KOR0654-4    | EU430487 |
| <i>B. gibsoni</i> | KOR0644-2    | EU430486 |
| <i>B. gibsoni</i> | KOR0501-10   | EU430481 |
| <i>B. gibsoni</i> | NRCPD        | AB478326 |
| <i>B. gibsoni</i> | Aomori       | AB118032 |
| <i>B. gibsoni</i> | TWN1         | EF587269 |
| <i>B. gibsoni</i> | TWN2         | EF587268 |
| <i>B. gibsoni</i> | CMVL-01/2014 | KY563118 |
| <i>B. gibsoni</i> | CMVL Apr-13  | KY524481 |
| <i>B. gibsoni</i> | G135         | LC169085 |
| <i>B. gibsoni</i> | G112         | LC169084 |
| <i>B. gibsoni</i> | G111         | LC169083 |
| <i>B. gibsoni</i> | MB_P3        | LC168621 |
| <i>B. gibsoni</i> | MB_D2        | LC168620 |
| <i>B. gibsoni</i> | YGC17        | LC012809 |
| <i>B. gibsoni</i> | YGC15        | LC012808 |
| <i>B. gibsoni</i> | YGC14        | LC012807 |
| <i>B. gibsoni</i> | YGC11        | LC012806 |
| <i>B. gibsoni</i> | YGC10        | LC012805 |
| <i>B. gibsoni</i> | YGC8         | LC012804 |
| <i>B. gibsoni</i> | YGC7         | LC012803 |
| <i>B. gibsoni</i> | TKS20        | LC012802 |
| <i>B. gibsoni</i> | TKS5         | LC012801 |
| <i>B. gibsoni</i> | OSK7         | LC012800 |
| <i>B. gibsoni</i> | OSK3         | LC012799 |
| <i>B. gibsoni</i> | NGS6         | LC012798 |
| <i>B. gibsoni</i> | KUM4         | LC012797 |
| <i>B. gibsoni</i> | KUM3         | LC012796 |
| <i>B. gibsoni</i> | KUM2         | LC012795 |
| <i>B. gibsoni</i> | KGW18        | LC012794 |

---



|                           |                   |                 |
|---------------------------|-------------------|-----------------|
| <i>B. gibsoni</i>         | KGS4              | LC012793        |
| <i>B. gibsoni</i>         | KGS1              | LC012792        |
| <i>B. gibsoni</i>         | HNNY-2/2013       | KJ715178        |
| <i>B. gibsoni</i>         | Nanjing1081       | HG328237        |
| <i>B. gibsoni</i>         | Nanjing0010       | HG328236        |
| <i>B. gibsoni</i>         | Nanjing0009       | HG328235        |
| <i>B. gibsoni</i>         | SK-013            | JX112784        |
| <i>B. gibsoni</i>         | Pig/J78           | JX962780        |
| <i>B. gibsoni</i>         | Aydin             | JN562745        |
| <i>B. gibsoni</i>         | 11HS              | EU084680        |
| <i>B. gibsoni</i>         | NA                | EU084679        |
| <i>B. gibsoni</i>         | NA                | EU084678        |
| <i>B. gibsoni</i>         | WM-1              | EU084677        |
| <i>B. gibsoni</i>         | Okinawa dog-15    | AY077718        |
| <b><i>B. bigemina</i></b> | <b>Swiss_6</b>    | <b>KM046917</b> |
| <i>B. bigemina</i>        | JRHC-1            | JX974332        |
| <i>B. bigemina</i>        | Umiam             | KF112076        |
| <i>B. bigemina</i>        | Hs5               | HQ688689        |
| <i>B. bigemina</i>        | Hs4               | HQ688688        |
| <i>B. bigemina</i>        | Hs3               | HQ688687        |
| <i>B. bigemina</i>        | Hs2               | HQ688686        |
| <i>B. bigemina</i>        | Hs1               | HQ688685        |
| <i>B. bigemina</i>        | Bab/Umi-H2/Ind    | KF606866        |
| <i>B. bigemina</i>        | Bab/Umi-Hi/12/Ind | KF606865        |
| <i>B. bigemina</i>        | Bab/Umi-C2/12/Ind | KF606864        |
| <i>B. bigemina</i>        | Bab/Umi-T2/10/Ind | KF606863        |
| <i>B. bigemina</i>        | RG                | JQ437264        |
| <i>B. bigemina</i>        | Bond              | JQ437261        |
| <i>B. bigemina</i>        | ZJK17             | KP710228        |
| <i>B. bigemina</i>        | TS103             | KP710227        |
| <i>B. bigemina</i>        | CZ52              | KP710226        |
| <i>B. bigemina</i>        | TJ09              | KP710225        |
| <i>B. bigemina</i>        | SJZ26             | KP710224        |
| <i>B. bigemina</i>        | MT26              | KU206297        |
| <i>B. bigemina</i>        | MT25              | KU206296        |
| <i>B. bigemina</i>        | KT4               | KU206295        |
| <i>B. bigemina</i>        | MT24              | KU206294        |
| <i>B. bigemina</i>        | MT23              | KU206293        |
| <i>B. bigemina</i>        | MT22              | KU206292        |
| <i>B. bigemina</i>        | MT21              | KU206291        |
| <i>B. bigemina</i>        | TB5               | KX115425        |
| <i>B. bigemina</i>        | Trkene3yumurta    | KP745624        |
| <i>B. bigemina</i>        | Trkoz10           | KP745623        |
| <i>B. bigemina</i>        | NA                | JQ723014        |
| <i>B. bigemina</i>        | biLushi           | JX495402        |
| <i>B. bigemina</i>        | PISJD34           | JX104106        |
| <i>B. bigemina</i>        | 563               | HQ840960        |
| <i>B. bigemina</i>        | 493               | HQ840959        |
| <i>B. bigemina</i>        | B_bi19            | EF458206        |
| <i>B. bigemina</i>        | B_bi18            | EF458205        |
| <i>B. bigemina</i>        | B_bi17            | EF458204        |
| <i>B. bigemina</i>        | B_bi16            | EF458203        |
| <i>B. bigemina</i>        | B_bi14            | EF458202        |
| <i>B. bigemina</i>        | B_bi12            | EF458201        |
| <i>B. bigemina</i>        | B_bi11            | EF458200        |
| <i>B. bigemina</i>        | B_bi10            | EF458199        |

---

|                          |                     |                 |
|--------------------------|---------------------|-----------------|
| <i>B. bigemina</i>       | B_bi09              | EF458198        |
| <i>B. bigemina</i>       | B_bi08              | EF458197        |
| <i>B. bigemina</i>       | B_bi07              | EF458196        |
| <i>B. bigemina</i>       | B_bi06              | EF458195        |
| <i>B. bigemina</i>       | B_bi05              | EF458194        |
| <i>B. bigemina</i>       | B_bi04              | EF458193        |
| <i>B. bigemina</i>       | B_bi03              | EF458192        |
| <i>B. bigemina</i>       | B_bi02              | EF458191        |
| <i>B. bigemina</i>       | B_bi01              | EF458190        |
| <i>B. bigemina</i>       | BRC02               | FJ426361        |
| <i>B. bigemina</i>       | Israel              | EF612434        |
| <i>B. bigemina</i>       | Spain_1             | DQ785311        |
| <b><i>B. microti</i></b> | <b>US-Bm5</b>       | <b>LC314658</b> |
| <i>B. microti</i>        | US-Bm4              | LC314657        |
| <i>B. microti</i>        | US-Bm3              | LC314656        |
| <i>B. microti</i>        | US-Bm2              | LC314655        |
| <i>B. microti</i>        | US-Bm1              | LC314654        |
| <i>B. microti</i>        | IpSG13-18-1         | LC127372        |
| <i>B. microti</i>        | IpSG13-16-3         | LC127371        |
| <i>B. microti</i>        | IpSG13-10-2         | LC127370        |
| <i>B. microti</i>        | IpSG13-1-2          | LC127369        |
| <i>B. microti</i>        | Omsk-Tr17           | KU955532        |
| <i>B. microti</i>        | Omsk-vole215_2015   | KU955531        |
| <i>B. microti</i>        | Omsk-vole205_2015   | KU955530        |
| <i>B. microti</i>        | Omsk-vole190_2015   | KU955529        |
| <i>B. microti</i>        | Omsk-vole118_2013   | KU955528        |
| <i>B. microti</i>        | Omsk-chipmunk2_2014 | KU955527        |
| <i>B. microti</i>        | Omsk-vole130_2013   | KU955526        |
| <i>B. microti</i>        | Omsk-vole92_2013    | KU955525        |
| <i>B. microti</i>        | Omsk-vole57_2013    | KU955524        |
| <i>B. microti</i>        | Omsk-vole45_2013    | KU955523        |
| <i>B. microti</i>        | Omsk-vole24_2013    | KU955522        |
| <i>B. microti</i>        | BmSSR218-3          | LC005772        |
| <i>B. microti</i>        | BmSSR218-2          | LC005771        |
| <i>B. microti</i>        | BmSSR218-1          | LC005770        |
| <i>B. microti</i>        | BmSSR209-3          | LC005769        |
| <i>B. microti</i>        | BmSSR209-1          | LC005768        |
| <i>B. microti</i>        | BmSSR206-3          | LC005767        |
| <i>B. microti</i>        | BmSSR206-2          | LC005766        |
| <i>B. microti</i>        | BmSSR206-1          | LC005765        |
| <i>B. microti</i>        | BmSSR190-5          | LC005764        |
| <i>B. microti</i>        | BmSSR190-4          | LC005763        |
| <i>B. microti</i>        | BmSSR190-3          | LC005762        |
| <i>B. microti</i>        | BmSSR170-3          | LC005761        |
| <i>B. microti</i>        | BmSSR170-2          | LC005760        |
| <i>B. microti</i>        | BmSSR170-1          | LC005759        |
| <i>B. microti</i>        | BmSSR168-3          | LC005758        |
| <i>B. microti</i>        | BmSSR168-1          | LC005757        |
| <i>B. microti</i>        | BmSSR167-9          | LC005756        |
| <i>B. microti</i>        | BmSSR167-3          | LC005755        |
| <i>B. microti</i>        | BmSSR167-1          | LC005754        |
| <i>B. microti</i>        | BmSSR161-2          | LC005753        |
| <i>B. microti</i>        | BmSSR159-1          | LC005752        |
| <i>B. microti</i>        | TC-2012-C1          | KF410827        |
| <i>B. microti</i>        | TC-2012-B99         | KF410826        |
| <i>B. microti</i>        | TC-2012-B87         | KF410825        |

---

---

|                   |              |          |
|-------------------|--------------|----------|
| <i>B. microti</i> | TC-2012-B1   | KF410824 |
| <i>B. microti</i> | Omsk-vole110 | KC581934 |
| <i>B. microti</i> | Yunnan-2     | KC147723 |
| <i>B. microti</i> | Yunnan-1     | KC147722 |
| <i>B. microti</i> | Ubl-104      | AY943958 |
| <i>B. microti</i> | Sbl-11       | AY943957 |
| <i>B. microti</i> | Gray         | AY693840 |
| <i>B. microti</i> | AF41002      | AY918952 |
| <i>B. microti</i> | AF2143       | AY918951 |
| <i>B. microti</i> | SN87-1       | AY144702 |
| <i>B. microti</i> | P8803        | AY144701 |
| <i>B. microti</i> | Rula         | AY144700 |
| <i>B. microti</i> | MT006        | AY144699 |
| <i>B. microti</i> | S837         | AY144698 |
| <i>B. microti</i> | Naushon      | AY144697 |
| <i>B. microti</i> | Nantucket    | AY144696 |
| <i>B. microti</i> | Pl2845Ips    | AY144695 |
| <i>B. microti</i> | Spooner      | AY144694 |
| <i>B. microti</i> | Russia       | AY144693 |
| <i>B. microti</i> | C5D182       | AY144692 |
| <i>B. microti</i> | VHSC1        | AY144691 |
| <i>B. microti</i> | GLS027Cg     | AY144690 |
| <i>B. microti</i> | 400          | AY144687 |
| <i>B. microti</i> | NA           | AB219802 |
| <i>B. microti</i> | MM-1         | EU168705 |
| <i>B. microti</i> | Jena/Germany | EF413181 |
| <i>B. microti</i> | NA           | AB197940 |
| <i>B. microti</i> | NA           | AY094354 |
| <i>B. microti</i> | Bm3          | KX008036 |
| <i>B. microti</i> | Bm2          | KX008035 |
| <i>B. microti</i> | Bm1          | KX008034 |
| <i>B. microti</i> | HLJ605       | KU204798 |
| <i>B. microti</i> | HLJ552       | KU204797 |
| <i>B. microti</i> | HLJ479       | KU204796 |
| <i>B. microti</i> | HLJ429       | KU204795 |
| <i>B. microti</i> | HLJ97        | KU204794 |
| <i>B. microti</i> | HLJ44        | KU204793 |
| <i>B. microti</i> | 4IV          | KT844560 |
| <i>B. microti</i> | 3IV          | KT844559 |
| <i>B. microti</i> | 2IV          | KT844558 |
| <i>B. microti</i> | 1IV          | KT844557 |
| <i>B. microti</i> | 5BA          | KT844556 |
| <i>B. microti</i> | 4BA          | KT844555 |
| <i>B. microti</i> | 3BA          | KT844554 |
| <i>B. microti</i> | 2BA          | KT844553 |
| <i>B. microti</i> | NA           | KT867773 |
| <i>B. microti</i> | NA           | KT318132 |
| <i>B. microti</i> | Irk-Ip332    | KJ486556 |
| <i>B. microti</i> | CNMM-2       | AB736270 |
| <i>B. microti</i> | CNMM-1       | AB731747 |
| <i>B. microti</i> | Yunnan-3     | KC147724 |
| <i>B. microti</i> | Rat/6        | JX962781 |
| <i>B. microti</i> | Fox/J28      | JX962779 |
| <i>B. microti</i> | hlj72        | JQ993429 |
| <i>B. microti</i> | 449-L        | JQ609304 |
| <i>B. microti</i> | JM1          | AB576641 |

---

|                            |                      |                 |
|----------------------------|----------------------|-----------------|
| <i>B. microti</i>          | Nov-Ip307            | GU057383        |
| <i>B. microti</i>          | NA                   | AY789075        |
| <i>B. microti</i>          | Kh-1026              | GU057386        |
| <i>B. microti</i>          | Kh-Ip67              | GU057384        |
| <i>B. microti</i>          | RI                   | XR_002459986    |
| <b><i>B. caballi</i></b>   | <b>B1_CABRBEQ179</b> | <b>EU642513</b> |
| <i>B. caballi</i>          | A_CABEQ30            | EU642512        |
| <i>B. caballi</i>          | B1_CABRBEQ164        | EU888904        |
| <i>B. caballi</i>          | CABEQ51_B1           | EU888901        |
| <i>B. caballi</i>          | CABEQ50_B1           | EU888900        |
| <i>B. caballi</i>          | B2_CABRBEQ115        | EU642514        |
| <i>B. caballi</i>          | NA                   | KJ549665        |
| <i>B. caballi</i>          | EqP-117              | JX049130        |
| <i>B. caballi</i>          | NA                   | MF384422        |
| <i>B. caballi</i>          | Jaboticabal          | KY952238        |
| <i>B. caballi</i>          | 142                  | KY952236        |
| <i>B. caballi</i>          | 157                  | KY952235        |
| <i>B. caballi</i>          | 151                  | KY952234        |
| <i>B. caballi</i>          | 143                  | KY952233        |
| <i>B. caballi</i>          | Bacab5               | KX375825        |
| <i>B. caballi</i>          | Bacab1               | KX375824        |
| <i>B. caballi</i>          | U244                 | AB734409        |
| <i>B. caballi</i>          | A134                 | AB734408        |
| <i>B. caballi</i>          | A135                 | AB734407        |
| <i>B. caballi</i>          | A139                 | AB734406        |
| <i>B. caballi</i>          | A195                 | AB734405        |
| <i>B. caballi</i>          | A161                 | AB734404        |
| <i>B. caballi</i>          | A188                 | AB734403        |
| <i>B. caballi</i>          | A142                 | AB734402        |
| <i>B. caballi</i>          | U237                 | AB734401        |
| <i>B. caballi</i>          | U243                 | AB734400        |
| <i>B. caballi</i>          | U244                 | AB734399        |
| <i>B. caballi</i>          | U232                 | AB734398        |
| <i>B. caballi</i>          | U231                 | AB734397        |
| <i>B. caballi</i>          | T23                  | AB734396        |
| <i>B. caballi</i>          | U240                 | AB734395        |
| <i>B. caballi</i>          | A214                 | AB734394        |
| <i>B. caballi</i>          | A158                 | AB734393        |
| <i>B. caballi</i>          | A123                 | AB734392        |
| <i>B. caballi</i>          | T103                 | AB734391        |
| <i>B. caballi</i>          | T90                  | AB734390        |
| <i>B. caballi</i>          | T64                  | AB734389        |
| <i>B. caballi</i>          | T48                  | AB734388        |
| <i>B. caballi</i>          | T16                  | AB734387        |
| <i>B. caballi</i>          | T4                   | AB734386        |
| <i>B. caballi</i>          | NA                   | FJ209026        |
| <i>B. caballi</i>          | NA                   | AY309955        |
| <i>B. caballi</i>          | EB1                  | AY534883        |
| <i>B. caballi</i>          | NA                   | Z15104          |
| <i>B. divergens</i>        | NA                   | AY144688        |
| <b><i>B. divergens</i></b> | <b>Spanish_2</b>     | <b>MG944238</b> |
| <i>B. divergens</i>        | IpSG14-2-2           | LC279018        |
| <i>B. divergens</i>        | IPSG13-13-1          | AB975389        |
| <i>B. divergens</i>        | Trbrt35              | KP745627        |
| <i>B. divergens</i>        | IpSG10               | KC493555        |
| <i>B. divergens</i>        | C139                 | FJ944826        |

---

|                        |              |                 |
|------------------------|--------------|-----------------|
| <i>B. divergens</i>    | 1802A        | FJ944825        |
| <i>B. divergens</i>    | Bob2         | FJ944824        |
| <i>B. divergens</i>    | CF2000       | FJ944823        |
| <i>B. divergens</i>    | Rouen 87     | FJ944822        |
| <i>B. divergens</i>    | B2           | EU182595        |
| <i>B. divergens</i>    | B1           | EU182594        |
| <i>B. divergens</i>    | HLJ216       | KU377437        |
| <i>B. divergens</i>    | HLJ216       | KU204799        |
| <i>B. divergens</i>    | R105         | KM657258        |
| <i>B. divergens</i>    | Spanish      | KF533077        |
| <i>B. divergens</i>    | Aug-43       | AB861507        |
| <i>B. divergens</i>    | Aug-40       | AB861506        |
| <i>B. divergens</i>    | 18-Aug       | AB861505        |
| <i>B. divergens</i>    | 4-Aug        | AB861504        |
| <i>B. divergens</i>    | Aug-38       | AB857846        |
| <i>B. divergens</i>    | Jul-33       | AB857845        |
| <i>B. divergens</i>    | 25-Aug       | KC465974        |
| <i>B. divergens</i>    | 12-Jul       | KC465977        |
| <i>B. divergens</i>    | Aug-41       | KC465976        |
| <i>B. divergens</i>    | 20-Jul       | KC465975        |
| <i>B. divergens</i>    | Aug-51       | KC465973        |
| <i>B. divergens</i>    | RD54         | JQ929916        |
| <i>B. divergens</i>    | CVD7         | GQ304525        |
| <i>B. divergens</i>    | CVD2         | GQ304524        |
| <i>B. divergens</i>    | Nov-Ip316    | GU057385        |
| <i>B. divergens</i>    | NA           | AY789076        |
| <i>B. divergens</i>    | BAB105       | AY046576        |
| <i>B. divergens</i>    | B_di09       | EF458228        |
| <i>B. divergens</i>    | B_di10       | EF458229        |
| <i>B. divergens</i>    | B_di08       | EF458227        |
| <i>B. divergens</i>    | B_di07       | EF458226        |
| <i>B. divergens</i>    | B_di06       | EF458225        |
| <i>B. divergens</i>    | B_di05       | EF458224        |
| <i>B. divergens</i>    | B_di04       | EF458223        |
| <i>B. divergens</i>    | B_di03       | EF458222        |
| <i>B. divergens</i>    | B_di02       | EF458221        |
| <i>B. divergens</i>    | B_di01       | EF458220        |
| <i>B. divergens</i>    | B_di11       | EF458219        |
| <i>B. divergens</i>    | NA           | AY572456        |
| <i>B. divergens</i>    | NA           | AJ439713        |
| <i>B. divergens</i>    | NA           | U16370          |
| <i>B. divergens</i>    | NA           | Z48751          |
| <b><i>B. bovis</i></b> | <b>BRC01</b> | <b>FJ426364</b> |
| <i>B. bovis</i>        | Bareilly     | KF928959        |
| <i>B. bovis</i>        | BBOV2        | L19077          |
| <i>B. bovis</i>        | BBOV3        | L19078          |
| <i>B. bovis</i>        | USDA         | HQ264112        |
| <i>B. bovis</i>        | USDA         | HQ264111        |
| <i>B. bovis</i>        | H8           | HQ264110        |
| <i>B. bovis</i>        | NR8          | HQ264106        |
| <i>B. bovis</i>        | NR8          | HQ264105        |
| <i>B. bovis</i>        | USDA         | GU906886        |
| <i>B. bovis</i>        | Merida       | GU906885        |
| <i>B. bovis</i>        | Merida       | GU906884        |
| <i>B. bovis</i>        | Merida       | GU906883        |
| <i>B. bovis</i>        | H81          | JQ437262        |

---

|                                         |                |                 |
|-----------------------------------------|----------------|-----------------|
| <i>B. bovis</i>                         | 8284           | JQ437260        |
| <i>B. bovis</i>                         | ZJK15          | KP710223        |
| <i>B. bovis</i>                         | TS35           | KP710222        |
| <i>B. bovis</i>                         | Trbrt36        | KP745628        |
| <i>B. bovis</i>                         | NA             | JQ723013        |
| <i>B. bovis</i>                         | boLushi        | JX495403        |
| <i>B. bovis</i>                         | cow            | AY150059        |
| <i>B. bovis</i>                         | B_bo18         | EF458218        |
| <i>B. bovis</i>                         | B_bo17         | EF458217        |
| <i>B. bovis</i>                         | B_bo16         | EF458216        |
| <i>B. bovis</i>                         | B_bo10         | EF458215        |
| <i>B. bovis</i>                         | B_bo09         | EF458214        |
| <i>B. bovis</i>                         | B_bo08         | EF458213        |
| <i>B. bovis</i>                         | B_bo07         | EF458212        |
| <i>B. bovis</i>                         | B_bo05         | EF458211        |
| <i>B. bovis</i>                         | B_bo03         | EF458210        |
| <i>B. bovis</i>                         | B_bo01         | EF458209        |
| <i>B. bovis</i>                         | B_bo19         | EF458208        |
| <b><i>B. conradae</i></b>               | <b>NA</b>      | <b>AF158702</b> |
| <b><i>B. vulpes</i></b>                 | <b>1061L</b>   | <b>KJ871352</b> |
| <i>B. vulpes</i>                        | 910L           | KJ871351        |
| <i>B. vulpes</i>                        | 03/00349       | KT223483        |
| <b><i>B. duncani</i></b>                | <b>BAB1615</b> | <b>HQ289870</b> |
| <i>B. duncani</i>                       | Bdu            | KX008042        |
| <i>B. duncani</i>                       | Bdi            | KX008037        |
| <i>B. duncani</i>                       | BAB2           | HQ285838        |
| <b><i>Theileria (Babesia) equei</i></b> | <b>RJ20</b>    | <b>KJ573374</b> |
| <i>Theileria (Babesia) equei</i>        | RJ19           | KJ573373        |
| <i>Theileria (Babesia) equei</i>        | RJ15           | KJ573372        |
| <i>Theileria (Babesia) equei</i>        | RJ4            | KJ573371        |
| <i>Theileria (Babesia) equei</i>        | RJ2            | KJ573370        |
| <i>Theileria (Babesia) equei</i>        | B_LFEQ164      | EU642511        |
| <i>Theileria (Babesia) equei</i>        | B_LFEQ47       | EU642510        |
| <i>Theileria (Babesia) equei</i>        | B_RBEQ105      | EU642509        |
| <i>Theileria (Babesia) equei</i>        | A1_RBEQ178     | EU642508        |
| <i>Theileria (Babesia) equei</i>        | A2_RBEQ101     | EU642507        |
| <i>Theileria (Babesia) equei</i>        | LFEQ23_A       | EU888906        |
| <i>Theileria (Babesia) equei</i>        | LFEQ178_C      | EU888905        |
| <i>Theileria (Babesia) equei</i>        | LFEQ189_C      | EU888903        |
| <i>Theileria (Babesia) equei</i>        | RBEQ63_A       | EU888902        |
| <i>Theileria (Babesia) equei</i>        | TE/18s/GUJ     | KP995259        |
| <i>Theileria (Babesia) equei</i>        | Te0022_CA      | JX177673        |
| <i>Theileria (Babesia) equei</i>        | Te0001_FL      | JX177672        |
| <i>Theileria (Babesia) equei</i>        | Te0002_TX      | JX177671        |
| <i>Theileria (Babesia) equei</i>        | Te0004_TX      | JX177670        |
| <i>Theileria (Babesia) equei</i>        | Ho233          | JQ390047        |
| <i>Theileria (Babesia) equei</i>        | NA             | KF559357        |
| <i>Theileria (Babesia) equei</i>        | 203-7          | JQ657703        |
| <i>Theileria (Babesia) equei</i>        | KNU            | HM229408        |
| <i>Theileria (Babesia) equei</i>        | KNU            | HM229407        |
| <i>Theileria (Babesia) equei</i>        | ET1            | AY534882        |
| <i>Theileria (Babesia) equei</i>        | H16            | KY111762        |
| <i>Theileria (Babesia) equei</i>        | H12            | KY111761        |
| <i>Theileria (Babesia) equei</i>        | H01            | KY111760        |
| <i>Theileria (Babesia) equei</i>        | RJ18           | KX722525        |
| <i>Theileria (Babesia) equei</i>        | RJ3            | KX722524        |

---

|                                  |                  |          |
|----------------------------------|------------------|----------|
| <i>Theileria (Babesia) eqeui</i> | RJ17             | KX722523 |
| <i>Theileria (Babesia) eqeui</i> | RJ16             | KX722522 |
| <i>Theileria (Babesia) eqeui</i> | RJ14             | KX722521 |
| <i>Theileria (Babesia) eqeui</i> | RJ13             | KX722520 |
| <i>Theileria (Babesia) eqeui</i> | RJ12             | KX722519 |
| <i>Theileria (Babesia) eqeui</i> | RJ11             | KX722518 |
| <i>Theileria (Babesia) eqeui</i> | RJ10             | KX722517 |
| <i>Theileria (Babesia) eqeui</i> | RJ9              | KX722516 |
| <i>Theileria (Babesia) eqeui</i> | RJ8              | KX722515 |
| <i>Theileria (Babesia) eqeui</i> | RJ7              | KX722514 |
| <i>Theileria (Babesia) eqeui</i> | RJ6              | KX722513 |
| <i>Theileria (Babesia) eqeui</i> | RJ5              | KX722512 |
| <i>Theileria (Babesia) eqeui</i> | RJ1              | KX722511 |
| <i>Theileria (Babesia) eqeui</i> | A11N             | KX227641 |
| <i>Theileria (Babesia) eqeui</i> | 156N             | KX227640 |
| <i>Theileria (Babesia) eqeui</i> | 347C             | KX227639 |
| <i>Theileria (Babesia) eqeui</i> | B1               | KX227638 |
| <i>Theileria (Babesia) eqeui</i> | 3011C            | KX227637 |
| <i>Theileria (Babesia) eqeui</i> | U4S              | KX227636 |
| <i>Theileria (Babesia) eqeui</i> | U2S              | KX227635 |
| <i>Theileria (Babesia) eqeui</i> | T1N              | KX227634 |
| <i>Theileria (Babesia) eqeui</i> | PA20             | KX227633 |
| <i>Theileria (Babesia) eqeui</i> | PA13             | KX227632 |
| <i>Theileria (Babesia) eqeui</i> | PA46             | KX227631 |
| <i>Theileria (Babesia) eqeui</i> | O5S              | KX227630 |
| <i>Theileria (Babesia) eqeui</i> | O2S              | KX227629 |
| <i>Theileria (Babesia) eqeui</i> | G6               | KX227628 |
| <i>Theileria (Babesia) eqeui</i> | F14C             | KX227627 |
| <i>Theileria (Babesia) eqeui</i> | E37C             | KX227626 |
| <i>Theileria (Babesia) eqeui</i> | 5512N            | KX227625 |
| <i>Theileria (Babesia) eqeui</i> | 177S             | KX227624 |
| <i>Theileria (Babesia) eqeui</i> | 101J             | KX227623 |
| <i>Theileria (Babesia) eqeui</i> | PA21             | KX227622 |
| <i>Theileria (Babesia) eqeui</i> | 20J              | KX227621 |
| <i>Theileria (Babesia) eqeui</i> | 9C               | KX227620 |
| <i>Theileria (Babesia) eqeui</i> | 459N             | KX227619 |
| <i>Theileria (Babesia) eqeui</i> | Ho-79            | KU672386 |
| <i>Theileria (Babesia) eqeui</i> | Swiss-5          | KM046922 |
| <i>Theileria (Babesia) eqeui</i> | Swiss-4          | KM046921 |
| <i>Theileria (Babesia) eqeui</i> | Swiss-3          | KM046920 |
| <i>Theileria (Babesia) eqeui</i> | Swiss-2          | KM046919 |
| <i>Theileria (Babesia) eqeui</i> | Swiss-1          | KM046918 |
| <i>Theileria (Babesia) eqeui</i> | JJ42             | KM819520 |
| <i>Theileria (Babesia) eqeui</i> | El Obied46       | AB515315 |
| <i>Theileria (Babesia) eqeui</i> | Kosti5           | AB515314 |
| <i>Theileria (Babesia) eqeui</i> | Omdurman2        | AB515313 |
| <i>Theileria (Babesia) eqeui</i> | Khartoum North15 | AB515312 |
| <i>Theileria (Babesia) eqeui</i> | Atbara13         | AB515311 |
| <i>Theileria (Babesia) eqeui</i> | Atbara8          | AB515310 |
| <i>Theileria (Babesia) eqeui</i> | Atbara5          | AB515309 |
| <i>Theileria (Babesia) eqeui</i> | Atbara2          | AB515308 |
| <i>Theileria (Babesia) eqeui</i> | Atbara1          | AB515307 |
| <i>Theileria (Babesia) eqeui</i> | T42              | AB733379 |
| <i>Theileria (Babesia) eqeui</i> | T10              | AB733378 |
| <i>Theileria (Babesia) eqeui</i> | U225             | AB733377 |
| <i>Theileria (Babesia) eqeui</i> | T95              | AB733376 |

---

|                                  |            |                 |
|----------------------------------|------------|-----------------|
| <i>Theileria (Babesia) equei</i> | A200       | AB733375        |
| <i>Theileria (Babesia) equei</i> | T8         | AB733374        |
| <i>Theileria (Babesia) equei</i> | A129       | AB733373        |
| <i>Theileria (Babesia) equei</i> | A128       | AB733372        |
| <i>Theileria (Babesia) equei</i> | dog        | AY150064        |
| <i>Theileria (Babesia) equei</i> | Spain-2    | AY150063        |
| <i>Theileria (Babesia) equei</i> | Spain-1    | AY150062        |
| <i>Theileria (Babesia) equei</i> | Spain-3    | DQ287951        |
| <i>Theileria (Babesia) equei</i> | NA         | Z15105          |
| <i>Cytauxzoon felis</i>          | NA         | L19080          |
| <b><i>Cytauxzoon felis</i></b>   | <b>309</b> | <b>KU306948</b> |
| <i>Cytauxzoon felis</i>          | 307        | KU306947        |
| <i>Cytauxzoon felis</i>          | 303        | KU306946        |
| <i>Cytauxzoon felis</i>          | 53aug      | KU306945        |
| <i>Cytauxzoon felis</i>          | 26-Aug     | KU306944        |
| <i>Cytauxzoon felis</i>          | 20-Aug     | KU306943        |
| <i>Cytauxzoon felis</i>          | 18-Aug     | KU306942        |
| <i>Cytauxzoon felis</i>          | 13-Aug     | KU306941        |
| <i>Cytauxzoon felis</i>          | 7-Oct      | KU306940        |
| <i>Cytauxzoon felis</i>          | NA         | AF399930        |
| <i>Cytauxzoon felis</i>          | NA         | GU903911        |

**Supplementary Table S7.** GenBank® accession codes for the *bipA* gene sequences of *Borrelia* species. Sequences utilized for *in silico* analysis in Supplementary Fig. S1 are emphasized in bold.

| <b><i>Borrelia</i> Species</b> | <b>Isolate/Strain</b> | <b>GeneBank®</b> |
|--------------------------------|-----------------------|------------------|
| <b><i>B. turicatae</i></b>     | <b>FCB-1</b>          | <b>C845531</b>   |
| <i>B. turicatae</i>            | NA                    | GU270942         |
| <i>B. turicatae</i>            | 91E135                | HM008710         |
| <i>B. turicatae</i>            | 95PE570               | KC845528         |
| <i>B. turicatae</i>            | TCB-2                 | KC845530         |
| <i>B. turicatae</i>            | 95PE1807              | KC845527         |
| <i>B. turicatae</i>            | BTE5EL                | CP015630         |
| <b><i>B. turicatae</i></b>     | <b>TCB-1</b>          | <b>KC845529</b>  |
| <b><i>B. parkeri</i></b>       | <b>HR1</b>            | <b>CP007036</b>  |
| <i>B. hermsii</i>              | SWA                   | GQ869822         |
| <i>B. hermsii</i>              | SIS                   | GQ869821         |
| <i>B. hermsii</i>              | RUM                   | GQ869820         |
| <i>B. hermsii</i>              | REN                   | GQ869819         |
| <i>B. hermsii</i>              | RAL                   | GQ869818         |
| <i>B. hermsii</i>              | OKA-3                 | GQ869817         |
| <i>B. hermsii</i>              | OKA-2                 | GQ869816         |
| <i>B. hermsii</i>              | OKA-1                 | GQ869815         |
| <i>B. hermsii</i>              | MTW-4                 | GQ869814         |
| <i>B. hermsii</i>              | MTW-3                 | GQ869813         |
| <i>B. hermsii</i>              | MTW-2                 | GQ869812         |
| <i>B. hermsii</i>              | MIL                   | GQ869811         |
| <i>B. hermsii</i>              | MCN                   | GQ869810         |
| <i>B. hermsii</i>              | MAT                   | GQ869809         |
| <i>B. hermsii</i>              | Man                   | GQ869808         |
| <i>B. hermsii</i>              | LAK-5                 | GQ869807         |
| <i>B. hermsii</i>              | LAK-4                 | GQ869806         |
| <i>B. hermsii</i>              | LAK-3                 | GQ869805         |
| <i>B. hermsii</i>              | LAK-2                 | GQ869804         |
| <i>B. hermsii</i>              | LAK-1                 | GQ869803         |
| <i>B. hermsii</i>              | HS1                   | GQ869802         |



|                          |            |                 |
|--------------------------|------------|-----------------|
| <i>B. hermsii</i>        | HAN        | GQ869801        |
| <i>B. hermsii</i>        | HAL        | GQ869800        |
| <i>B. hermsii</i>        | GMC        | GQ869799        |
| <i>B. hermsii</i>        | GAR        | GQ869798        |
| <i>B. hermsii</i>        | FRS        | GQ869797        |
| <i>B. hermsii</i>        | FRO        | GQ869796        |
| <i>B. hermsii</i>        | FRE        | GQ869795        |
| <i>B. hermsii</i>        | EST        | GQ869794        |
| <i>B. hermsii</i>        | CON        | GQ869792        |
| <i>B. hermsii</i>        | CMC        | GQ869791        |
| <i>B. hermsii</i>        | CAR        | GQ869790        |
| <i>B. hermsii</i>        | BYM        | GQ869789        |
| <i>B. hermsii</i>        | BRO        | GQ869788        |
| <i>B. hermsii</i>        | BAK        | GQ869787        |
| <i>B. hermsii</i>        | ALL        | GQ869786        |
| <b><i>B. hermsii</i></b> | <b>YOR</b> | <b>GQ869824</b> |
| <b><i>B. hermsii</i></b> | <b>DAH</b> | <b>GQ869793</b> |
| <i>B. hermsii</i>        | DAH        | FJ446703        |
| <i>B. hermsii</i>        | WAD        | GQ869823        |

**Supplementary Table S8.** GenBank® accession codes for the *flaB* gene sequences of *Borrelia* species. Sequences utilized for *in silico* analysis in Supplementary Fig. S1 are emphasized in bold.

| <b><i>Borrelia</i> Species</b> | <b>Isolate/Strain</b> | <b>GeneBank®</b>   |
|--------------------------------|-----------------------|--------------------|
| <i>B. turicatae</i>            | FCB                   | AY934630           |
| <b><i>B. turicatae</i></b>     | <b>TCB-2</b>          | <b>AY934629</b>    |
| <i>B. turicatae</i>            | TCB-1                 | AY934628           |
| <i>B. turicatae</i>            | PE1-926               | AY934627           |
| <i>B. turicatae</i>            | 99PE-1807             | AY934626           |
| <i>B. turicatae</i>            | 95PE-570              | AY934625           |
| <i>B. turicatae</i>            | 91E135                | AY934624           |
| <i>B. turicatae</i>            | 91E135                | AY604979           |
| <i>B. turicatae</i>            | 91E135                | NC_008710          |
| <i>B. parkeri</i>              | CA221                 | AY934623           |
| <i>B. parkeri</i>              | CA220                 | AY934622           |
| <i>B. parkeri</i>              | CA219                 | AY934621           |
| <i>B. parkeri</i>              | CA218                 | AY934620           |
| <i>B. parkeri</i>              | CA216                 | AY934619           |
| <i>B. parkeri</i>              | RML                   | AY604980           |
| <i>B. parkeri</i>              | HR1                   | CP007022           |
| <b><i>B. parkeri</i></b>       | <b>SLO</b>            | <b>NZ_CP005851</b> |
| <i>B. miyamotoi</i>            | HoHe                  | KT932823           |
| <i>B. miyamotoi</i>            | ARH554                | KT452933           |
| <i>B. miyamotoi</i>            | ARH624                | KT452932           |
| <i>B. miyamotoi</i>            | ARH615                | KT452930           |
| <i>B. miyamotoi</i>            | ARH657                | KT452931           |
| <i>B. miyamotoi</i>            | CT13-2396             | CP017126           |
| <i>B. miyamotoi</i>            | ARH656                | KT452934           |
| <i>B. miyamotoi</i>            | Izh-16                | CP024351           |
| <i>B. miyamotoi</i>            | Izh-4                 | CP024390           |
| <i>B. miyamotoi</i>            | Yekat-6               | CP024316           |
| <i>B. miyamotoi</i>            | Izh-5                 | CP024205           |
| <i>B. miyamotoi</i>            | Izh-14                | CP024371           |
| <i>B. miyamotoi</i>            | Yekat-1               | CP024333           |
| <b><i>B. miyamotoi</i></b>     | <b>FR64b</b>          | <b>CP004217</b>    |
| <i>B. miyamotoi</i>            | CA17-2241             | CP021872           |

---

|                              |                        |                    |
|------------------------------|------------------------|--------------------|
| <i>B. miyamotoi</i>          | 13T392                 | KU749379           |
| <i>B. miyamotoi</i>          | 15H532                 | KU749378           |
| <i>B. coriaceae</i>          | NA                     | DQ320140           |
| <b><i>B. coriaceae</i></b>   | <b>Co53</b>            | <b>NZ_CP005745</b> |
| <i>B. anserina</i>           | 5AY_H01_8-125ans_E_G03 | KY438930           |
| <i>B. anserina</i>           | Es                     | CP013704           |
| <i>B. anserina</i>           | PL                     | DQ849626           |
| <b><i>B. anserina</i></b>    | <b>BA2</b>             | <b>CP005829</b>    |
| <i>B. crocidurae</i>         | DOS-27                 | JX292911           |
| <i>B. crocidurae</i>         | DOU-1b                 | JX292912           |
| <i>B. crocidurae</i>         | DOU-686                | JX292913           |
| <i>B. crocidurae</i>         | DOU-690                | JX292914           |
| <i>B. crocidurae</i>         | DOU                    | JX292915           |
| <i>B. crocidurae</i>         | DOS-2                  | JX292916           |
| <i>B. crocidurae</i>         | DOS-3                  | JX292917           |
| <i>B. crocidurae</i>         | DOS-6                  | JX292919           |
| <i>B. crocidurae</i>         | DOS-5                  | JX292918           |
| <i>B. crocidurae</i>         | DOS-7                  | JX292920           |
| <i>B. crocidurae</i>         | DOS-13                 | JX292921           |
| <i>B. crocidurae</i>         | DOS-16                 | JX292922           |
| <i>B. crocidurae</i>         | Achema                 | GU357619           |
| <b><i>B. crocidurae</i></b>  | <b>DOS-56</b>          | <b>JX292925</b>    |
| <i>B. crocidurae</i>         | KOS-46                 | JX292924           |
| <i>B. crocidurae</i>         | KOS-39                 | JX292923           |
| <i>B. crocidurae</i>         | Achema                 | CP003426           |
| <b><i>B. recurrentis</i></b> | <b>A1</b>              | <b>DQ346814</b>    |
| <i>B. recurrentis</i>        | 107                    | AY604982           |
| <i>B. recurrentis</i>        | A2                     | DQ346815           |
| <i>B. recurrentis</i>        | A3                     | DQ346816           |
| <i>B. recurrentis</i>        | A4                     | DQ346817           |
| <i>B. recurrentis</i>        | A6                     | DQ346819           |
| <i>B. recurrentis</i>        | A5                     | DQ346818           |
| <i>B. recurrentis</i>        | A18                    | DQ346831           |
| <i>B. recurrentis</i>        | A17                    | DQ346830           |
| <i>B. recurrentis</i>        | A16                    | DQ346829           |
| <i>B. recurrentis</i>        | A15                    | DQ346828           |
| <i>B. recurrentis</i>        | A14                    | DQ346827           |
| <i>B. recurrentis</i>        | A13                    | DQ346826           |
| <i>B. recurrentis</i>        | A12                    | DQ346825           |
| <i>B. recurrentis</i>        | A11                    | DQ346824           |
| <i>B. recurrentis</i>        | A10                    | DQ346823           |
| <i>B. recurrentis</i>        | A9                     | DQ346822           |
| <i>B. recurrentis</i>        | A8                     | DQ346821           |
| <i>B. recurrentis</i>        | A7                     | DQ346820           |
| <i>B. recurrentis</i>        | A1                     | CP000993           |
| <i>B. burgdorferi</i>        | DG1-04                 | DQ016625           |
| <i>B. burgdorferi</i>        | GL56-07                | HM345910           |
| <i>B. burgdorferi</i>        | D69-04                 | DQ016620           |
| <i>B. burgdorferi</i>        | T90-5-02               | HM345911           |
| <i>B. burgdorferi</i>        | Bb_V2                  | MF150052           |
| <i>B. burgdorferi</i>        | Bb_V3                  | MF150053           |
| <i>B. burgdorferi</i>        | Bb_V6                  | MF150055           |
| <i>B. burgdorferi</i>        | Bb_V5                  | MF150054           |
| <i>B. burgdorferi</i>        | Bb_V7                  | MF150056           |
| <i>B. burgdorferi</i>        | Tr293                  | AB091813           |
| <i>B. burgdorferi</i>        | NA                     | AB189460           |

---

---

|                              |             |                 |
|------------------------------|-------------|-----------------|
| <i>B. burgdorferi</i>        | CA8         | GQ247741        |
| <i>B. burgdorferi</i>        | B331        | CP017201        |
| <i>B. burgdorferi</i>        | Pabe        | CP019916        |
| <i>B. burgdorferi</i>        | Pali        | CP019844        |
| <i>B. burgdorferi</i>        | B31-5A1     | CP009656        |
| <i>B. burgdorferi</i>        | CA382       | CP005925        |
| <i>B. burgdorferi</i>        | N40         | CP002228        |
| <i>B. burgdorferi</i>        | JD1         | CP002312        |
| <i>B. burgdorferi</i>        | ZS7         | CP001205        |
| <b><i>B. burgdorferi</i></b> | <b>B31</b>  | <b>AE000783</b> |
| <i>B. afzelii</i>            | A1_Aag_Waw  | KY626318        |
| <i>B. afzelii</i>            | A1_Afl_Waw  | KY626319        |
| <i>B. afzelii</i>            | B1_Aag_Waw  | KY626320        |
| <i>B. afzelii</i>            | B2_Aag_Waw  | KY626321        |
| <i>B. afzelii</i>            | B3_Aag_Waw  | KY626322        |
| <i>B. afzelii</i>            | B4_Aag_Waw  | KY626323        |
| <i>B. afzelii</i>            | B5_Aag_Waw  | KY626324        |
| <i>B. afzelii</i>            | B6_Afl_Waw  | KY626325        |
| <i>B. afzelii</i>            | Ba_V1a      | MF150047        |
| <i>B. afzelii</i>            | Ba_V1b      | MF150048        |
| <i>B. afzelii</i>            | Ba_V2cc     | MF150049        |
| <i>B. afzelii</i>            | Ba_v2ct     | MF150050        |
| <i>B. afzelii</i>            | Ba_V2tc     | MF150051        |
| <i>B. afzelii</i>            | NA          | AB236667        |
| <i>B. afzelii</i>            | Tr38        | AB091806        |
| <i>B. afzelii</i>            | Tr96        | AB091808        |
| <i>B. afzelii</i>            | NA          | AB189459        |
| <i>B. afzelii</i>            | DB19N7-04   | GQ918147        |
| <i>B. afzelii</i>            | 41-M-11     | KF894063        |
| <i>B. afzelii</i>            | 9W10-04     | FJ874924        |
| <i>B. afzelii</i>            | Mr11        | AB178334        |
| <i>B. afzelii</i>            | Mp6         | AB178335        |
| <i>B. afzelii</i>            | 29-MD-11    | KF894069        |
| <i>B. afzelii</i>            | 21-O-12     | KF894067        |
| <i>B. afzelii</i>            | 25-M-11     | KF894068        |
| <i>B. afzelii</i>            | 14-MD-12    | KF894066        |
| <i>B. afzelii</i>            | 9-S-11      | KF894065        |
| <i>B. afzelii</i>            | 80-M-11     | KF894064        |
| <i>B. afzelii</i>            | CFC8E       | AB178780        |
| <i>B. afzelii</i>            | Mp4         | AB178779        |
| <i>B. afzelii</i>            | 51-S-12     | KF894070        |
| <i>B. afzelii</i>            | OS17-07     | HM345909        |
| <i>B. afzelii</i>            | ST19-05     | HM345908        |
| <i>B. afzelii</i>            | ZL109-07    | HM345907        |
| <b><i>B. afzelii</i></b>     | <b>BO23</b> | <b>CP018262</b> |
| <i>B. afzelii</i>            | K78         | CP009058        |
| <i>B. afzelii</i>            | Tom3107     | CP009212        |
| <i>B. afzelii</i>            | HLJ01       | CP003882        |
| <i>B. afzelii</i>            | Pko         | CP002933        |
| <i>B. afzelii</i>            | Pko         | CP000395        |
| <i>B. garinii</i>            | D106-04     | DQ016621        |
| <i>B. garinii</i>            | D7-04       | DQ016622        |
| <i>B. garinii</i>            | DB1F7-04    | DQ650331        |
| <i>B. garinii</i>            | DB18N6-04   | DQ650333        |
| <i>B. garinii</i>            | T32-5-05    | DQ650336        |
| <i>B. garinii</i>            | PB35-99     | HM345897        |

---

---

|                          |           |                 |
|--------------------------|-----------|-----------------|
| <i>B. garinii</i>        | DB74-01   | HM345898        |
| <i>B. garinii</i>        | T40-10-02 | HM345902        |
| <i>B. garinii</i>        | T53-9-02  | HM345901        |
| <i>B. garinii</i>        | ZL148-07  | HM345900        |
| <i>B. garinii</i>        | DB60-01   | HM345899        |
| <i>B. garinii</i>        | RP54-05   | HM345906        |
| <i>B. garinii</i>        | ST12-05   | HM345905        |
| <i>B. garinii</i>        | T44-4-02  | HM345904        |
| <i>B. garinii</i>        | T41-2-02  | HM345903        |
| <i>B. garinii</i>        | Bg_vA     | MF150057        |
| <i>B. garinii</i>        | Bg_vAa    | MF150058        |
| <i>B. garinii</i>        | Bg_vC     | MF150062        |
| <i>B. garinii</i>        | Bg_vBb    | MF150061        |
| <i>B. garinii</i>        | Bg_vBa    | MF150060        |
| <i>B. garinii</i>        | Bg_vB     | MF150059        |
| <i>B. garinii</i>        | Bg_vDf    | MF150069        |
| <i>B. garinii</i>        | Bg_vDe    | MF150068        |
| <i>B. garinii</i>        | Bg_vDd    | MF150067        |
| <i>B. garinii</i>        | Bg_vDc    | MF150066        |
| <i>B. garinii</i>        | Bg_vDb    | MF150065        |
| <i>B. garinii</i>        | Bg_vDa    | MF150064        |
| <i>B. garinii</i>        | Bg_vCa    | MF150063        |
| <i>B. garinii</i>        | Bg_vEa    | MF150070        |
| <i>B. garinii</i>        | Bg_vEb    | MF150071        |
| <i>B. garinii</i>        | Bg_vEc    | MF150072        |
| <i>B. garinii</i>        | Bg_vEd    | MF150073        |
| <i>B. garinii</i>        | Bg_vEf    | MF150074        |
| <i>B. garinii</i>        | Tr77      | AB091807        |
| <i>B. garinii</i>        | Tr309     | AB091814        |
| <i>B. garinii</i>        | Mr8       | AB178325        |
| <i>B. garinii</i>        | Mr3       | AB178326        |
| <i>B. garinii</i>        | Mr10      | AB178327        |
| <i>B. garinii</i>        | Nr267     | AB178328        |
| <i>B. garinii</i>        | Mp5       | AB178329        |
| <i>B. garinii</i>        | Mr12      | AB178330        |
| <i>B. garinii</i>        | 23-M-11   | KF894053        |
| <i>B. garinii</i>        | 39-M-11   | KF894052        |
| <i>B. garinii</i>        | Mp7       | AB178332        |
| <i>B. garinii</i>        | 61-M-11   | KF894058        |
| <i>B. garinii</i>        | 56-M-11   | KF894057        |
| <i>B. garinii</i>        | 67-S-12   | KF894056        |
| <i>B. garinii</i>        | 66-S-12   | KF894055        |
| <i>B. garinii</i>        | 60-S-12   | KF894054        |
| <i>B. garinii</i>        | 77-M-11   | KF894061        |
| <i>B. garinii</i>        | 58-M-11   | KF894060        |
| <i>B. garinii</i>        | 55-M-11   | KF894059        |
| <i>B. garinii</i>        | Nsk-10-06 | EU979630        |
| <b><i>B. garinii</i></b> | <b>SZ</b> | <b>CP007564</b> |
| <i>B. hermsii</i> GGI    | LAK-4     | DQ855533        |
| <i>B. hermsii</i> GGI    | ELD       | DQ855531        |
| <i>B. hermsii</i> GGI    | HS1       | EF583449        |
| <i>B. hermsii</i> GGI    | HS1       | GU357620        |
| <i>B. hermsii</i> GGI    | WAD       | AY597794        |
| <i>B. hermsii</i> GGI    | MAN       | AY597793        |
| <i>B. hermsii</i> GGI    | ALL       | AY597791        |
| <i>B. hermsii</i> GGI    | GAR       | AY597790        |

---

---

|                               |            |                 |
|-------------------------------|------------|-----------------|
| <i>B. hermsii</i> GGI         | FR0        | AY597789        |
| <i>B. hermsii</i> GGI         | SIS        | AY597788        |
| <i>B. hermsii</i> GGI         | RAL        | AY597787        |
| <i>B. hermsii</i> GGI         | BAK        | AY597786        |
| <i>B. hermsii</i> GGI         | BYM        | AY597785        |
| <i>B. hermsii</i> GGI         | CAR        | AY597784        |
| <i>B. hermsii</i> GGI         | SWA        | AY597783        |
| <i>B. hermsii</i> GGI         | FRE        | AY597782        |
| <i>B. hermsii</i> GGI         | C0N        | AY597781        |
| <i>B. hermsii</i> GGI         | HAL        | AY597780        |
| <i>B. hermsii</i> GGI         | BR0        | AY597779        |
| <b><i>B. hermsii</i> GGI</b>  | <b>DAH</b> | <b>AY597777</b> |
| <i>B. hermsii</i> GGI         | HS1        | CP014349        |
| <i>B. hermsii</i> GGI         | MIT-24     | KX171817        |
| <i>B. hermsii</i> GGI         | YBT-21     | KX171812        |
| <i>B. hermsii</i> GGI         | YBT-12     | KX171807        |
| <i>B. hermsii</i> GGI         | YBT-7      | KX171805        |
| <i>B. hermsii</i> GGI         | YBS-1171   | KX171804        |
| <i>B. hermsii</i> GGI         | WHT-8      | KX171798        |
| <i>B. hermsii</i> GGI         | DM-31      | KX171797        |
| <i>B. hermsii</i> GGI         | WHS-90     | KX171796        |
| <i>B. hermsii</i> GGI         | LAK-6      | KX171792        |
| <i>B. hermsii</i> GGI         | WAR        | KC883464        |
| <i>B. hermsii</i> GGI         | CC1        | JF737019        |
| <i>B. hermsii</i> GGI         | EST        | AY597792        |
| <i>B. hermsii</i> GGI         | OWL        | GQ175063        |
| <i>B. hermsii</i> GGI         | YB-Th-60   | GQ175059        |
| <i>B. hermsii</i> GGI         | HCT-4      | KJ995789        |
| <i>B. hermsii</i> GGI         | COR        | KJ995774        |
| <i>B. hermsii</i> GGI         | DAH 2E7    | CP014808        |
| <i>B. hermsii</i> GGII        | LAK-5      | DQ855534        |
| <i>B. hermsii</i> GGII        | LAK-3      | DQ855532        |
| <i>B. hermsii</i> GGII        | REN        | AY597805        |
| <i>B. hermsii</i> GGII        | OKA-3      | AY597804        |
| <i>B. hermsii</i> GGII        | OKA-2      | AY597803        |
| <i>B. hermsii</i> GGII        | OKA-1      | AY597802        |
| <i>B. hermsii</i> GGII        | HAN        | AY597801        |
| <i>B. hermsii</i> GGII        | SIL        | AY597800        |
| <i>B. hermsii</i> GGII        | LAK-2      | AY597799        |
| <i>B. hermsii</i> GGII        | LAK-1      | AY597798        |
| <i>B. hermsii</i> GGII        | RUM        | AY597797        |
| <i>B. hermsii</i> GGII        | GMC        | AY597796        |
| <i>B. hermsii</i> GGII        | CMC        | AY597795        |
| <b><i>B. hermsii</i> GGII</b> | <b>YOR</b> | <b>AY597806</b> |
| <i>B. hermsii</i> GGII        | MAT        | DQ855535        |
| <i>B. hermsii</i> GGII        | MIL        | AY597778        |
| <i>B. hermsii</i> GGII        | YBS-60     | KX171799        |
| <i>B. hermsii</i> GGII        | MIT-27     | KX171816        |
| <i>B. hermsii</i> GGII        | MIT-26     | KX171815        |
| <i>B. hermsii</i> GGII        | MIS-491    | KX171814        |
| <i>B. hermsii</i> GGII        | MIS-1014   | KX171813        |
| <i>B. hermsii</i> GGII        | YBT-20     | KX171811        |
| <i>B. hermsii</i> GGII        | YBT-18     | KX171810        |
| <i>B. hermsii</i> GGII        | YBT-17     | KX171809        |
| <i>B. hermsii</i> GGII        | YBT-13     | KX171808        |
| <i>B. hermsii</i> GGII        | YBT-10     | KX171806        |

---

|                        |          |          |
|------------------------|----------|----------|
| <i>B. hermsii</i> GGII | YBS-1143 | KX171803 |
| <i>B. hermsii</i> GGII | YBS-479  | KX171802 |
| <i>B. hermsii</i> GGII | YBS-266  | KX171801 |
| <i>B. hermsii</i> GGII | YBS-70   | KX171800 |
| <i>B. hermsii</i> GGII | WHS-88   | KX171795 |
| <i>B. hermsii</i> GGII | WHS-81   | KX171794 |
| <i>B. hermsii</i> GGII | WHS-40   | KX171793 |
| <i>B. hermsii</i> GGII | WCB-1    | KC883463 |
| <i>B. hermsii</i> GGII | LP0      | EF595741 |
| <i>B. hermsii</i> GGII | MTW-2    | EU194843 |
| <i>B. hermsii</i> GGII | MTW-1    | EU194839 |
| <i>B. hermsii</i> GGII | COT-7    | KJ995784 |

**Supplementary Table S9.** GenBank® accession codes for the *msp2* gene sequences of *Anaplasma phagocytophilum*. Sequences utilized for *in silico* analysis in Supplementary Fig. S1 are emphasized in bold.

| <i>Anaplasma</i> Species  | Isolate/Strain | GeneBank®       |
|---------------------------|----------------|-----------------|
| <i>A. phagocytophilum</i> | <b>HZ</b>      | <b>CP000235</b> |
| <i>A. phagocytophilum</i> | AP-V1          | AY780258        |
| <i>A. phagocytophilum</i> | LL             | AY568558        |
| <i>A. phagocytophilum</i> | MRK            | AY568557        |
| <i>A. phagocytophilum</i> | NY-31          | AY541007        |
| <i>A. phagocytophilum</i> | NY-36          | AY541006        |
| <i>A. phagocytophilum</i> | NY-37          | AY541005        |
| <i>A. phagocytophilum</i> | OS             | AY541004        |
| <i>A. phagocytophilum</i> | Trustom        | AY541003        |
| <i>A. phagocytophilum</i> | AVK-HLPA1      | AY541002        |
| <i>A. phagocytophilum</i> | Gaillard       | AY541001        |
| <i>A. phagocytophilum</i> | MN-2           | AY541000        |
| <i>A. phagocytophilum</i> | MN-9           | AY540999        |
| <i>A. phagocytophilum</i> | S1025/09       | JF893912        |
| <i>A. phagocytophilum</i> | S2630/07       | JF893911        |
| <i>A. phagocytophilum</i> | S2614/07       | JF893910        |
| <i>A. phagocytophilum</i> | S1829/04       | JF893909        |
| <i>A. phagocytophilum</i> | S1741/07       | JF893908        |
| <i>A. phagocytophilum</i> | S1729/08       | JF893907        |
| <i>A. phagocytophilum</i> | S1523/07       | JF893906        |
| <i>A. phagocytophilum</i> | S1379/06       | JF893905        |
| <i>A. phagocytophilum</i> | S1220/08       | JF893904        |
| <i>A. phagocytophilum</i> | S1201/05       | JF893903        |
| <i>A. phagocytophilum</i> | S1085/09       | JF893902        |
| <i>A. phagocytophilum</i> | S1074/09       | JF893901        |
| <i>A. phagocytophilum</i> | S1071/08       | JF893900        |
| <i>A. phagocytophilum</i> | S654/04        | JF893899        |
| <i>A. phagocytophilum</i> | Cc20           | FJ812387        |
| <i>A. phagocytophilum</i> | Ce9            | FJ812384        |
| <i>A. phagocytophilum</i> | NY18           | AY164513        |
| <i>A. phagocytophilum</i> | 6497           | JN656334        |
| <i>A. phagocytophilum</i> | 9774           | JN656332        |
| <i>A. phagocytophilum</i> | 630300         | JN656333        |
| <i>A. phagocytophilum</i> | 8776           | JN656331        |
| <i>A. phagocytophilum</i> | 232            | JN656330        |
| <i>A. phagocytophilum</i> | 15526          | JN656329        |
| <i>A. phagocytophilum</i> | 6385           | JN656328        |
| <i>A. phagocytophilum</i> | S2872/07       | JN656327        |

|                           |          |          |
|---------------------------|----------|----------|
| <i>A. phagocytophilum</i> | 2838     | JN656326 |
| <i>A. phagocytophilum</i> | S1710/05 | JN656325 |
| <i>A. phagocytophilum</i> | 8340     | JN656324 |
| <i>A. phagocytophilum</i> | 14524    | JN656323 |
| <i>A. phagocytophilum</i> | 50       | JN656319 |
| <i>A. phagocytophilum</i> | 6380     | JN656318 |
| <i>A. phagocytophilum</i> | 633200   | JN656317 |
| <i>A. phagocytophilum</i> | KD       | JN656316 |
| <i>A. phagocytophilum</i> | 4        | JN656315 |
| <i>A. phagocytophilum</i> | 67       | JN656314 |
| <i>A. phagocytophilum</i> | 1219     | JN656313 |
| <i>A. phagocytophilum</i> | 614      | JN656312 |
| <i>A. phagocytophilum</i> | 14908    | JN656310 |
| <i>A. phagocytophilum</i> | 20684    | JN656311 |
| <i>A. phagocytophilum</i> | 3547     | JN656309 |
| <i>A. phagocytophilum</i> | 754      | JN656308 |
| <i>A. phagocytophilum</i> | 7444     | JN656307 |
| <i>A. phagocytophilum</i> | 8074     | JN656306 |
| <i>A. phagocytophilum</i> | 29W      | JN656304 |
| <i>A. phagocytophilum</i> | 20489    | JN656305 |
| <i>A. phagocytophilum</i> | S2070/03 | JN656303 |
| <i>A. phagocytophilum</i> | 152595   | JN656302 |
| <i>A. phagocytophilum</i> | 680200   | JN656301 |
| <i>A. phagocytophilum</i> | 44       | JN656300 |
| <i>A. phagocytophilum</i> | 19555    | JN656299 |
| <i>A. phagocytophilum</i> | 9698     | JN656298 |
| <i>A. phagocytophilum</i> | 14888    | JN656297 |
| <i>A. phagocytophilum</i> | R1592    | JN244019 |
| <i>A. phagocytophilum</i> | ovine 5  | AY706393 |
| <i>A. phagocytophilum</i> | Elsa     | AY706392 |
| <i>A. phagocytophilum</i> | JM       | CP006617 |
| <i>A. phagocytophilum</i> | HZ2      | CP006616 |

**Supplementary Table S10.** GenBank® accession codes for the *rrhyp* gene sequences of *Rickettsia rickettsii*. Sequences utilized for *in silico* analysis in Supplementary Fig. S1 are emphasized in bold.

| <i>Rickettsia</i> Species   | Isolate/Strain      | GeneBank®       |
|-----------------------------|---------------------|-----------------|
| <i>R. rickettsii</i>        | Iowa                | CP018914        |
| <i>R. rickettsii</i>        | Iowa                | CP018913        |
| <i>R. rickettsii</i>        | Morgan              | CP006010        |
| <i>R. rickettsii</i>        | Iowa                | CP000766        |
| <i>R. rickettsii</i>        | Hauke               | CP003318        |
| <i>R. rickettsii</i>        | Hino                | CP003309        |
| <i>R. rickettsii</i>        | Arizona             | CP003307        |
| <i>R. rickettsii</i>        | Colombia            | CP003306        |
| <i>R. rickettsii</i>        | Brazil              | CP003305        |
| <i>R. rickettsii</i>        | R                   | CP006009        |
| <b><i>R. rickettsii</i></b> | <b>Sheila Smith</b> | <b>CP000848</b> |
| <i>R. rickettsii</i>        | Hlp#2               | CP003311        |

**Supplementary Table S11.** Paired t-test statistical analysis of *Borrelia* species with singleplex (SP) and Layerplex (LP) qPCR testing. Mean values reported as quantification cycles (Cq) from triplicate testing.

|                | <i>B. hermsii</i> |        | <i>B. turicatae</i> |        | <i>B. parkeri</i> |        | <i>B. burgdorferi</i> |        |
|----------------|-------------------|--------|---------------------|--------|-------------------|--------|-----------------------|--------|
|                | SP                | LP     | SP                  | LP     | SP                | LP     | SP                    | LP     |
| Mean           | 26.040            | 27.306 | 23.550              | 25.713 | 26.018            | 25.912 | 25.061                | 25.297 |
| Variance       | 1.133             | 0.254  | 0.245               | 0.191  | 0.014             | 0.014  | 0.003                 | 0.014  |
| Observations   | 3                 | 3      | 3                   | 3      | 3                 | 3      | 3                     | 3      |
| P(T≤) two-tail | 0.068             |        | 0.723               |        | 0.423             |        | 0.125                 |        |

**Supplementary Table S12.** Paired t-test statistical analysis of *Ehrlichia*, *Anaplasma*, and *Rickettsia* species with singleplex (SP) and layerplex (LP) qPCR testing. Mean values reported as quantification cycles (Cq) from triplicate testing.

|                | <i>E. canis</i> |        | <i>E. chaffeensis</i> |        | <i>E. ewingii</i> |        | <i>A. phagocytophilum</i> |        | <i>R. rickettsii</i> |        |
|----------------|-----------------|--------|-----------------------|--------|-------------------|--------|---------------------------|--------|----------------------|--------|
|                | SP              | LP     | SP                    | LP     | SP                | LP     | SP                        | LP     | SP                   | LP     |
| Mean           | 25.434          | 25.253 | 25.429                | 25.475 | 25.387            | 25.280 | 25.906                    | 25.894 | 25.302               | 25.394 |
| Variance       | 0.017           | 0.032  | 0.011                 | 0.005  | 0.005             | 0.003  | 0.280                     | 0.091  | 0.001                | 0.017  |
| Observations   | 3               | 3      | 3                     | 3      | 3                 | 3      | 3                         | 3      | 3                    | 3      |
| P(T≤) two-tail | 0.252           |        | 0.207                 |        | 0.146             |        | 0.941                     |        | 0.272                |        |

**Supplementary Table S13.** Paired t-test statistical analysis of *Babesia* species with singleplex (SP) and layerplex (LP) qPCR testing. Mean values reported as quantification cycles (Cq) from triplicate testing.

|                | <i>Babesia</i> spp. |        |
|----------------|---------------------|--------|
|                | SP                  | LP     |
| Mean           | 25.196              | 25.126 |
| Variance       | 0.001               | 0.001  |
| Observations   | 3                   | 3      |
| P(T≤) two-tail | 0.135               |        |

**Supplementary Table S14.** Paired t-test statistical analysis of the canine specific endogenous internal positive control (EIPC-K9) with singleplex (SP) and layerplex (LP) qPCR testing. Mean values reported as quantification cycles (Cq) from triplicate testing.

|                | EIPC-K9 |        |
|----------------|---------|--------|
|                | SP      | LP     |
| Mean           | 25.673  | 25.175 |
| Variance       | 0.026   | 0.166  |
| Observations   | 3       | 3      |
| P(T≤) two-tail | 0.093   |        |
